# Supplementary material
Source: publisher figshare collection journal article supplement (https://frontiersin.figshare.com/ndownloader/files/25995128)
Supplement: Supplementary file 1 [file 25995128]

## Sheet: Drennan et al 2020 PGC_table_v6
recordNumber	occurrenceID	recordedBy	organismName	identifiedBy	individualCount	sex	lifeStage	reproductiveCondition	establishmentMeans	occurrenceStatus	preparations	disposition	kingdom	phylum	class	subclass	family	subfamily	genus	scientificName	scientificNameAuthorship	scientificNameID	taxonRank	identificationRemarks	fieldNumber	eventID	eventDate	eventTime	samplingProtocol	decimalLatitude	decimalLongitude	geodeticDatum	maximumDepthInMeters	higherGeography	continent	waterBody	locality	locationID	locationRemarks	language	institutionCode	collectionCode	basisOfRecord	functional_category	size
JR17003_ID_0030_1	JR17003_ID_0030_1	Adrian G Glover | Thomas G Dahlgren	Sternaspis sendalli	Regan Drennan	60	unknown	adult	unknown	native	present	specimen stored in 80% non-denatured ethanol aqueous solution	in collection	Animalia	Annelida	Polychaeta		Sternaspidae		Sternaspis	Sternaspis sendalli	Salazar-Vallejo, 2014	urn:lsid:marinespecies.org:taxname:817290	species	Preliminary identification, molecular identification to follow	4	JR17003a_1_4	2018-03-01	16:23:00	Agassiz Trawl	-63.5755	-57.2954	WGS84	1080.63	Antarctica | Southern Ocean	Antarctica	Southern Ocean	Duse Bay	3981	RRS James Clark Ross JR17003a | site Duse Bay 1000 m | locationID based on SCAR Composite Gazetteer Of Antarctica	en	NHMUK	British Antarctic Survey expedition JR17003a	PreservedSpecimen	burrowing	small
JR17003_ID_0032	JR17003_ID_0032	Adrian G Glover | Thomas G Dahlgren	Aglaophamus trissophyllus	Regan Drennan	1	unknown	adult	unknown	native	present	specimen stored in 80% non-denatured ethanol aqueous solution	in collection	Animalia	Annelida	Polychaeta		Nephtyidae		Aglaophamus	Aglaophamus trissophyllus	(Grube, 1877)	urn:lsid:marinespecies.org:taxname:173693	species	Preliminary identification, molecular identification to follow	4	JR17003a_1_4	2018-03-01	16:23:00	Agassiz Trawl	-63.5755	-57.2954	WGS84	1080.63	Antarctica | Southern Ocean	Antarctica	Southern Ocean	Duse Bay	3981	RRS James Clark Ross JR17003a | site Duse Bay 1000 m | locationID based on SCAR Composite Gazetteer Of Antarctica	en	NHMUK	British Antarctic Survey expedition JR17003a	PreservedSpecimen	motile surface-dwelling omnivorous	large
JR17003_ID_0033	JR17003_ID_0033	Adrian G Glover | Thomas G Dahlgren	Austrolaenilla antarctica	Regan Drennan	3	unknown	adult	unknown	native	present	specimen stored in 80% non-denatured ethanol aqueous solution	in collection	Animalia	Annelida	Polychaeta		Polynoidae		Austrolaenilla	Austrolaenilla antarctica	Bergström, 1916	urn:lsid:marinespecies.org:taxname:155221	species	Preliminary identification, molecular identification to follow	4	JR17003a_1_4	2018-03-01	16:23:00	Agassiz Trawl	-63.5755	-57.2954	WGS84	1080.63	Antarctica | Southern Ocean	Antarctica	Southern Ocean	Duse Bay	3981	RRS James Clark Ross JR17003a | site Duse Bay 1000 m | locationID based on SCAR Composite Gazetteer Of Antarctica	en	NHMUK	British Antarctic Survey expedition JR17003a	PreservedSpecimen	motile surface-dwelling omnivorous	medium
JR17003_ID_0033B	JR17003_ID_0033B	Adrian G Glover | Thomas G Dahlgren	Aglaophamus trissophyllus	Regan Drennan	1	unknown	adult	unknown	native	present	specimen stored in 80% non-denatured ethanol aqueous solution	in collection	Animalia	Annelida	Polychaeta		Nephtyidae		Aglaophamus	Aglaophamus trissophyllus	(Grube, 1877)	urn:lsid:marinespecies.org:taxname:173693	species	Preliminary identification, molecular identification to follow	4	JR17003a_1_4	2018-03-01	16:23:00	Agassiz Trawl	-63.5755	-57.2954	WGS84	1080.63	Antarctica | Southern Ocean	Antarctica	Southern Ocean	Duse Bay	3981	RRS James Clark Ross JR17003a | site Duse Bay 1000 m | locationID based on SCAR Composite Gazetteer Of Antarctica	en	NHMUK	British Antarctic Survey expedition JR17003a	PreservedSpecimen	motile surface-dwelling omnivorous	medium
JR17003_ID_0044	JR17003_ID_0044	Adrian G Glover | Thomas G Dahlgren	Antarctinoe ferox	Regan Drennan	1	unknown	adult	unknown	native	present	specimen stored in 80% non-denatured ethanol aqueous solution	in collection	Animalia	Annelida	Polychaeta		Polynoidae		Antarctinoe	Antarctinoe ferox	(Baird, 1865)	urn:lsid:marinespecies.org:taxname:236689	species	Preliminary identification, molecular identification to follow	4	JR17003a_1_4	2018-03-01	16:23:00	Agassiz Trawl	-63.5755	-57.2954	WGS84	1080.63	Antarctica | Southern Ocean	Antarctica	Southern Ocean	Duse Bay	3981	RRS James Clark Ross JR17003a | site Duse Bay 1000 m | locationID based on SCAR Composite Gazetteer Of Antarctica	en	NHMUK	British Antarctic Survey expedition JR17003a	PreservedSpecimen	motile surface-dwelling omnivorous	medium
JR17003_ID_0061A	JR17003_ID_0061A	Adrian G Glover | Thomas G Dahlgren	Sternaspis sendalli	Regan Drennan	91	unknown	adult	unknown	native	present	specimen stored in 80% non-denatured ethanol aqueous solution	in collection	Animalia	Annelida	Polychaeta		Sternaspidae		Sternaspis	Sternaspis sendalli	Salazar-Vallejo, 2014	urn:lsid:marinespecies.org:taxname:817290	species	Preliminary identification, molecular identification to follow	4	JR17003a_1_4	2018-03-01	16:23:00	Agassiz Trawl	-63.5755	-57.2954	WGS84	1080.63	Antarctica | Southern Ocean	Antarctica	Southern Ocean	Duse Bay	3981	RRS James Clark Ross JR17003a | site Duse Bay 1000 m | locationID based on SCAR Composite Gazetteer Of Antarctica	en	NHMUK	British Antarctic Survey expedition JR17003a	PreservedSpecimen	burrowing	small
JR17003_ID_0061B	JR17003_ID_0061B	Adrian G Glover | Thomas G Dahlgren	Maldane sarsi	Regan Drennan	1	unknown	adult	unknown	native	present	specimen stored in 80% non-denatured ethanol aqueous solution	in collection	Animalia	Annelida	Polychaeta		Maldanidae		Maldane	Maldane sarsi	Malmgren, 1865	urn:lsid:marinespecies.org:taxname:130305	species	Preliminary identification, molecular identification to follow	4	JR17003a_1_4	2018-03-01	16:23:00	Agassiz Trawl	-63.5755	-57.2954	WGS84	1080.63	Antarctica | Southern Ocean	Antarctica	Southern Ocean	Duse Bay	3981	RRS James Clark Ross JR17003a | site Duse Bay 1000 m | locationID based on SCAR Composite Gazetteer Of Antarctica	en	NHMUK	British Antarctic Survey expedition JR17003a	PreservedSpecimen	burrowing	medium
JR17003_NHM_001	JR17003_NHM_001	Adrian G Glover | Thomas G Dahlgren	Sternaspis sendalli	Regan Drennan	1	unknown	adult	unknown	native	present	specimen stored in 80% non-denatured ethanol aqueous solution	in collection	Animalia	Annelida	Polychaeta		Sternaspidae		Sternaspis	Sternaspis sendalli	Salazar-Vallejo, 2014	urn:lsid:marinespecies.org:taxname:817290	species	Preliminary identification, molecular identification to follow	4	JR17003a_1_4	2018-03-01	16:23:00	Agassiz Trawl	-63.5755	-57.2954	WGS84	1080.63	Antarctica | Southern Ocean	Antarctica	Southern Ocean	Duse Bay	3981	RRS James Clark Ross JR17003a | site Duse Bay 1000 m | locationID based on SCAR Composite Gazetteer Of Antarctica	en	NHMUK	British Antarctic Survey expedition JR17003a	PreservedSpecimen	burrowing	small
JR17003_NHM_002	JR17003_NHM_002	Adrian G Glover | Thomas G Dahlgren	Sternaspis sendalli	Regan Drennan	1	unknown	adult	unknown	native	present	specimen stored in 80% non-denatured ethanol aqueous solution	in collection	Animalia	Annelida	Polychaeta		Sternaspidae		Sternaspis	Sternaspis sendalli	Salazar-Vallejo, 2014	urn:lsid:marinespecies.org:taxname:817290	species	Preliminary identification, molecular identification to follow	4	JR17003a_1_4	2018-03-01	16:23:00	Agassiz Trawl	-63.5755	-57.2954	WGS84	1080.63	Antarctica | Southern Ocean	Antarctica	Southern Ocean	Duse Bay	3981	RRS James Clark Ross JR17003a | site Duse Bay 1000 m | locationID based on SCAR Composite Gazetteer Of Antarctica	en	NHMUK	British Antarctic Survey expedition JR17003a	PreservedSpecimen	burrowing	small
JR17003_NHM_003	JR17003_NHM_003	Adrian G Glover | Thomas G Dahlgren	Sternaspis sendalli	Regan Drennan	1	unknown	adult	unknown	native	present	specimen stored in 80% non-denatured ethanol aqueous solution	in collection	Animalia	Annelida	Polychaeta		Sternaspidae		Sternaspis	Sternaspis sendalli	Salazar-Vallejo, 2014	urn:lsid:marinespecies.org:taxname:817290	species	Preliminary identification, molecular identification to follow	4	JR17003a_1_4	2018-03-01	16:23:00	Agassiz Trawl	-63.5755	-57.2954	WGS84	1080.63	Antarctica | Southern Ocean	Antarctica	Southern Ocean	Duse Bay	3981	RRS James Clark Ross JR17003a | site Duse Bay 1000 m | locationID based on SCAR Composite Gazetteer Of Antarctica	en	NHMUK	British Antarctic Survey expedition JR17003a	PreservedSpecimen	burrowing	small
JR17003_NHM_004	JR17003_NHM_004	Adrian G Glover | Thomas G Dahlgren	Sternaspis sendalli	Regan Drennan	1	unknown	adult	unknown	native	present	specimen stored in 80% non-denatured ethanol aqueous solution	in collection	Animalia	Annelida	Polychaeta		Sternaspidae		Sternaspis	Sternaspis sendalli	Salazar-Vallejo, 2014	urn:lsid:marinespecies.org:taxname:817290	species	Preliminary identification, molecular identification to follow	4	JR17003a_1_4	2018-03-01	16:23:00	Agassiz Trawl	-63.5755	-57.2954	WGS84	1080.63	Antarctica | Southern Ocean	Antarctica	Southern Ocean	Duse Bay	3981	RRS James Clark Ross JR17003a | site Duse Bay 1000 m | locationID based on SCAR Composite Gazetteer Of Antarctica	en	NHMUK	British Antarctic Survey expedition JR17003a	PreservedSpecimen	burrowing	small
JR17003_NHM_005	JR17003_NHM_005	Adrian G Glover | Thomas G Dahlgren	Sternaspis sendalli	Regan Drennan	1	unknown	adult	unknown	native	present	specimen stored in 80% non-denatured ethanol aqueous solution	in collection	Animalia	Annelida	Polychaeta		Sternaspidae		Sternaspis	Sternaspis sendalli	Salazar-Vallejo, 2014	urn:lsid:marinespecies.org:taxname:817290	species	Preliminary identification, molecular identification to follow	4	JR17003a_1_4	2018-03-01	16:23:00	Agassiz Trawl	-63.5755	-57.2954	WGS84	1080.63	Antarctica | Southern Ocean	Antarctica	Southern Ocean	Duse Bay	3981	RRS James Clark Ross JR17003a | site Duse Bay 1000 m | locationID based on SCAR Composite Gazetteer Of Antarctica	en	NHMUK	British Antarctic Survey expedition JR17003a	PreservedSpecimen	burrowing	small
JR17003_NHM_006	JR17003_NHM_006	Adrian G Glover | Thomas G Dahlgren	Sternaspis sendalli	Regan Drennan	1	unknown	adult	unknown	native	present	specimen stored in 80% non-denatured ethanol aqueous solution	in collection	Animalia	Annelida	Polychaeta		Sternaspidae		Sternaspis	Sternaspis sendalli	Salazar-Vallejo, 2014	urn:lsid:marinespecies.org:taxname:817290	species	Preliminary identification, molecular identification to follow	4	JR17003a_1_4	2018-03-01	16:23:00	Agassiz Trawl	-63.5755	-57.2954	WGS84	1080.63	Antarctica | Southern Ocean	Antarctica	Southern Ocean	Duse Bay	3981	RRS James Clark Ross JR17003a | site Duse Bay 1000 m | locationID based on SCAR Composite Gazetteer Of Antarctica	en	NHMUK	British Antarctic Survey expedition JR17003a	PreservedSpecimen	burrowing	small
JR17003_NHM_007	JR17003_NHM_007	Adrian G Glover | Thomas G Dahlgren	Sternaspis sendalli	Regan Drennan	5	unknown	adult	unknown	native	present	specimen stored in 80% non-denatured ethanol aqueous solution	in collection	Animalia	Annelida	Polychaeta		Sternaspidae		Sternaspis	Sternaspis sendalli	Salazar-Vallejo, 2014	urn:lsid:marinespecies.org:taxname:817290	species	Preliminary identification, molecular identification to follow	4	JR17003a_1_4	2018-03-01	16:23:00	Agassiz Trawl	-63.5755	-57.2954	WGS84	1080.63	Antarctica | Southern Ocean	Antarctica	Southern Ocean	Duse Bay	3981	RRS James Clark Ross JR17003a | site Duse Bay 1000 m | locationID based on SCAR Composite Gazetteer Of Antarctica	en	NHMUK	British Antarctic Survey expedition JR17003a	PreservedSpecimen	burrowing	small
JR17003_NHM_008	JR17003_NHM_008	Adrian G Glover | Thomas G Dahlgren	Sternaspis sendalli	Regan Drennan	6	unknown	adult	unknown	native	present	specimen stored in 80% non-denatured ethanol aqueous solution	in collection	Animalia	Annelida	Polychaeta		Sternaspidae		Sternaspis	Sternaspis sendalli	Salazar-Vallejo, 2014	urn:lsid:marinespecies.org:taxname:817290	species	Preliminary identification, molecular identification to follow	4	JR17003a_1_4	2018-03-01	16:23:00	Agassiz Trawl	-63.5755	-57.2954	WGS84	1080.63	Antarctica | Southern Ocean	Antarctica	Southern Ocean	Duse Bay	3981	RRS James Clark Ross JR17003a | site Duse Bay 1000 m | locationID based on SCAR Composite Gazetteer Of Antarctica	en	NHMUK	British Antarctic Survey expedition JR17003a	PreservedSpecimen	burrowing	small
JR17003_NHM_011	JR17003_NHM_011	Adrian G Glover | Thomas G Dahlgren	Aglaophamus trissophyllus	Regan Drennan	1	unknown	adult	unknown	native	present	specimen stored in 80% non-denatured ethanol aqueous solution	in collection	Animalia	Annelida	Polychaeta		Nephtyidae		Aglaophamus	Aglaophamus trissophyllus	(Grube, 1877)	urn:lsid:marinespecies.org:taxname:173693	species	Preliminary identification, molecular identification to follow	4	JR17003a_1_4	2018-03-01	16:23:00	Agassiz Trawl	-63.5755	-57.2954	WGS84	1080.63	Antarctica | Southern Ocean	Antarctica	Southern Ocean	Duse Bay	3981	RRS James Clark Ross JR17003a | site Duse Bay 1000 m | locationID based on SCAR Composite Gazetteer Of Antarctica	en	NHMUK	British Antarctic Survey expedition JR17003a	PreservedSpecimen	motile surface-dwelling omnivorous	large
JR17003_NHM_013	JR17003_NHM_013	Adrian G Glover | Thomas G Dahlgren	Aglaophamus trissophyllus	Regan Drennan	1	unknown	adult	unknown	native	present	specimen stored in 80% non-denatured ethanol aqueous solution	in collection	Animalia	Annelida	Polychaeta		Nephtyidae		Aglaophamus	Aglaophamus trissophyllus	(Grube, 1877)	urn:lsid:marinespecies.org:taxname:173693	species	Preliminary identification, molecular identification to follow	4	JR17003a_1_4	2018-03-01	16:23:00	Agassiz Trawl	-63.5755	-57.2954	WGS84	1080.63	Antarctica | Southern Ocean	Antarctica	Southern Ocean	Duse Bay	3981	RRS James Clark Ross JR17003a | site Duse Bay 1000 m | locationID based on SCAR Composite Gazetteer Of Antarctica	en	NHMUK	British Antarctic Survey expedition JR17003a	PreservedSpecimen	motile surface-dwelling omnivorous	large
JR17003_NHM_015	JR17003_NHM_015	Adrian G Glover | Thomas G Dahlgren	Austrolaenilla antarctica	Regan Drennan	1	unknown	adult	unknown	native	present	specimen stored in 80% non-denatured ethanol aqueous solution	in collection	Animalia	Annelida	Polychaeta		Polynoidae		Austrolaenilla	Austrolaenilla antarctica	Bergström, 1916	urn:lsid:marinespecies.org:taxname:155221	species	Preliminary identification, molecular identification to follow	4	JR17003a_1_4	2018-03-01	16:23:00	Agassiz Trawl	-63.5755	-57.2954	WGS84	1080.63	Antarctica | Southern Ocean	Antarctica	Southern Ocean	Duse Bay	3981	RRS James Clark Ross JR17003a | site Duse Bay 1000 m | locationID based on SCAR Composite Gazetteer Of Antarctica	en	NHMUK	British Antarctic Survey expedition JR17003a	PreservedSpecimen	motile surface-dwelling omnivorous	medium
JR17003_NHM_016	JR17003_NHM_016	Adrian G Glover | Thomas G Dahlgren	Aglaophamus trissophyllus	Regan Drennan	1	unknown	adult	unknown	native	present	specimen stored in 80% non-denatured ethanol aqueous solution	in collection	Animalia	Annelida	Polychaeta		Nephtyidae		Aglaophamus	Aglaophamus trissophyllus	(Grube, 1877)	urn:lsid:marinespecies.org:taxname:173693	species	Preliminary identification, molecular identification to follow	4	JR17003a_1_4	2018-03-01	16:23:00	Agassiz Trawl	-63.5755	-57.2954	WGS84	1080.63	Antarctica | Southern Ocean	Antarctica	Southern Ocean	Duse Bay	3981	RRS James Clark Ross JR17003a | site Duse Bay 1000 m | locationID based on SCAR Composite Gazetteer Of Antarctica	en	NHMUK	British Antarctic Survey expedition JR17003a	PreservedSpecimen	motile surface-dwelling omnivorous	large
JR17003_NHM_017	JR17003_NHM_017	Adrian G Glover | Thomas G Dahlgren	Aglaophamus trissophyllus	Regan Drennan	1	unknown	adult	unknown	native	present	specimen stored in 80% non-denatured ethanol aqueous solution	in collection	Animalia	Annelida	Polychaeta		Nephtyidae		Aglaophamus	Aglaophamus trissophyllus	(Grube, 1877)	urn:lsid:marinespecies.org:taxname:173693	species	Preliminary identification, molecular identification to follow	4	JR17003a_1_4	2018-03-01	16:23:00	Agassiz Trawl	-63.5755	-57.2954	WGS84	1080.63	Antarctica | Southern Ocean	Antarctica	Southern Ocean	Duse Bay	3981	RRS James Clark Ross JR17003a | site Duse Bay 1000 m | locationID based on SCAR Composite Gazetteer Of Antarctica	en	NHMUK	British Antarctic Survey expedition JR17003a	PreservedSpecimen	motile surface-dwelling omnivorous	large
JR17003_NHM_019	JR17003_NHM_019	Adrian G Glover | Thomas G Dahlgren	Maldane sarsi	Regan Drennan	1	unknown	adult	unknown	native	present	specimen stored in 80% non-denatured ethanol aqueous solution	in collection	Animalia	Annelida	Polychaeta		Maldanidae		Maldane	Maldane sarsi	Malmgren, 1865	urn:lsid:marinespecies.org:taxname:130305	species	Preliminary identification, molecular identification to follow	4	JR17003a_1_4	2018-03-01	16:23:00	Agassiz Trawl	-63.5755	-57.2954	WGS84	1080.63	Antarctica | Southern Ocean	Antarctica	Southern Ocean	Duse Bay	3981	RRS James Clark Ross JR17003a | site Duse Bay 1000 m | locationID based on SCAR Composite Gazetteer Of Antarctica	en	NHMUK	British Antarctic Survey expedition JR17003a	PreservedSpecimen	burrowing	medium
JR17003_NHM_020	JR17003_NHM_020	Adrian G Glover | Thomas G Dahlgren	Augeneria tentaculata	Regan Drennan	1	unknown	adult	unknown	native	present	specimen stored in 80% non-denatured ethanol aqueous solution	in collection	Animalia	Annelida	Polychaeta		Lumbrineridae		Augeneria	Augeneria tentaculata	Monro, 1930	urn:lsid:marinespecies.org:taxname:130225	species	Preliminary identification, molecular identification to follow	4	JR17003a_1_4	2018-03-01	16:23:00	Agassiz Trawl	-63.5755	-57.2954	WGS84	1080.63	Antarctica | Southern Ocean	Antarctica	Southern Ocean	Duse Bay	3981	RRS James Clark Ross JR17003a | site Duse Bay 1000 m | locationID based on SCAR Composite Gazetteer Of Antarctica	en	NHMUK	British Antarctic Survey expedition JR17003a	PreservedSpecimen	burrowing	medium
JR17003_NHM_022	JR17003_NHM_022	Adrian G Glover | Thomas G Dahlgren	Maldane sarsi	Regan Drennan	1	unknown	adult	unknown	native	present	specimen stored in 80% non-denatured ethanol aqueous solution	in collection	Animalia	Annelida	Polychaeta		Maldanidae		Maldane	Maldane sarsi	Malmgren, 1865	urn:lsid:marinespecies.org:taxname:130305	species	Preliminary identification, molecular identification to follow	4	JR17003a_1_4	2018-03-01	16:23:00	Agassiz Trawl	-63.5755	-57.2954	WGS84	1080.63	Antarctica | Southern Ocean	Antarctica	Southern Ocean	Duse Bay	3981	RRS James Clark Ross JR17003a | site Duse Bay 1000 m | locationID based on SCAR Composite Gazetteer Of Antarctica	en	NHMUK	British Antarctic Survey expedition JR17003a	PreservedSpecimen	burrowing	medium
JR17003_NHM_023	JR17003_NHM_023	Adrian G Glover | Thomas G Dahlgren	Maldane sarsi	Regan Drennan	1	unknown	adult	unknown	native	present	specimen stored in 80% non-denatured ethanol aqueous solution	in collection	Animalia	Annelida	Polychaeta		Maldanidae		Maldane	Maldane sarsi	Malmgren, 1865	urn:lsid:marinespecies.org:taxname:130305	species	Preliminary identification, molecular identification to follow	4	JR17003a_1_4	2018-03-01	16:23:00	Agassiz Trawl	-63.5755	-57.2954	WGS84	1080.63	Antarctica | Southern Ocean	Antarctica	Southern Ocean	Duse Bay	3981	RRS James Clark Ross JR17003a | site Duse Bay 1000 m | locationID based on SCAR Composite Gazetteer Of Antarctica	en	NHMUK	British Antarctic Survey expedition JR17003a	PreservedSpecimen	burrowing	medium
JR17003_NHM_024	JR17003_NHM_024	Adrian G Glover | Thomas G Dahlgren	Maldane sarsi	Regan Drennan	1	unknown	adult	unknown	native	present	specimen stored in 80% non-denatured ethanol aqueous solution	in collection	Animalia	Annelida	Polychaeta		Maldanidae		Maldane	Maldane sarsi	Malmgren, 1865	urn:lsid:marinespecies.org:taxname:130305	species	Preliminary identification, molecular identification to follow	4	JR17003a_1_4	2018-03-01	16:23:00	Agassiz Trawl	-63.5755	-57.2954	WGS84	1080.63	Antarctica | Southern Ocean	Antarctica	Southern Ocean	Duse Bay	3981	RRS James Clark Ross JR17003a | site Duse Bay 1000 m | locationID based on SCAR Composite Gazetteer Of Antarctica	en	NHMUK	British Antarctic Survey expedition JR17003a	PreservedSpecimen	burrowing	medium
JR17003_NHM_025	JR17003_NHM_025	Adrian G Glover | Thomas G Dahlgren	Maldane sarsi	Regan Drennan	1	unknown	adult	unknown	native	present	specimen stored in 80% non-denatured ethanol aqueous solution	in collection	Animalia	Annelida	Polychaeta		Maldanidae		Maldane	Maldane sarsi	Malmgren, 1865	urn:lsid:marinespecies.org:taxname:130305	species	Preliminary identification, molecular identification to follow	4	JR17003a_1_4	2018-03-01	16:23:00	Agassiz Trawl	-63.5755	-57.2954	WGS84	1080.63	Antarctica | Southern Ocean	Antarctica	Southern Ocean	Duse Bay	3981	RRS James Clark Ross JR17003a | site Duse Bay 1000 m | locationID based on SCAR Composite Gazetteer Of Antarctica	en	NHMUK	British Antarctic Survey expedition JR17003a	PreservedSpecimen	burrowing	medium
JR17003_NHM_026	JR17003_NHM_026	Adrian G Glover | Thomas G Dahlgren	Augeneria tentaculata	Regan Drennan	1	unknown	adult	unknown	native	present	specimen stored in 80% non-denatured ethanol aqueous solution	in collection	Animalia	Annelida	Polychaeta		Lumbrineridae		Augeneria	Augeneria tentaculata	Monro, 1930	urn:lsid:marinespecies.org:taxname:130225	species	Preliminary identification, molecular identification to follow	4	JR17003a_1_4	2018-03-01	16:23:00	Agassiz Trawl	-63.5755	-57.2954	WGS84	1080.63	Antarctica | Southern Ocean	Antarctica	Southern Ocean	Duse Bay	3981	RRS James Clark Ross JR17003a | site Duse Bay 1000 m | locationID based on SCAR Composite Gazetteer Of Antarctica	en	NHMUK	British Antarctic Survey expedition JR17003a	PreservedSpecimen	burrowing	medium
JR17003_NHM_027	JR17003_NHM_027	Adrian G Glover | Thomas G Dahlgren	Augeneria tentaculata	Regan Drennan	1	unknown	adult	unknown	native	present	specimen stored in 80% non-denatured ethanol aqueous solution	in collection	Animalia	Annelida	Polychaeta		Lumbrineridae		Augeneria	Augeneria tentaculata	Monro, 1930	urn:lsid:marinespecies.org:taxname:130225	species	Preliminary identification, molecular identification to follow	4	JR17003a_1_4	2018-03-01	16:23:00	Agassiz Trawl	-63.5755	-57.2954	WGS84	1080.63	Antarctica | Southern Ocean	Antarctica	Southern Ocean	Duse Bay	3981	RRS James Clark Ross JR17003a | site Duse Bay 1000 m | locationID based on SCAR Composite Gazetteer Of Antarctica	en	NHMUK	British Antarctic Survey expedition JR17003a	PreservedSpecimen	burrowing	medium
JR17003_NHM_029	JR17003_NHM_029	Adrian G Glover | Thomas G Dahlgren	Austrolaenilla antarctica	Regan Drennan	1	unknown	adult	unknown	native	present	specimen stored in 80% non-denatured ethanol aqueous solution	in collection	Animalia	Annelida	Polychaeta		Polynoidae		Austrolaenilla	Austrolaenilla antarctica	Bergström, 1916	urn:lsid:marinespecies.org:taxname:155221	species	Preliminary identification, molecular identification to follow	4	JR17003a_1_4	2018-03-01	16:23:00	Agassiz Trawl	-63.5755	-57.2954	WGS84	1080.63	Antarctica | Southern Ocean	Antarctica	Southern Ocean	Duse Bay	3981	RRS James Clark Ross JR17003a | site Duse Bay 1000 m | locationID based on SCAR Composite Gazetteer Of Antarctica	en	NHMUK	British Antarctic Survey expedition JR17003a	PreservedSpecimen	motile surface-dwelling omnivorous	medium
JR17003_NHM_030	JR17003_NHM_030	Adrian G Glover | Thomas G Dahlgren	Maldane sarsi	Regan Drennan	1	unknown	adult	unknown	native	present	specimen stored in 80% non-denatured ethanol aqueous solution	in collection	Animalia	Annelida	Polychaeta		Maldanidae		Maldane	Maldane sarsi	Malmgren, 1865	urn:lsid:marinespecies.org:taxname:130305	species	Preliminary identification, molecular identification to follow	4	JR17003a_1_4	2018-03-01	16:23:00	Agassiz Trawl	-63.5755	-57.2954	WGS84	1080.63	Antarctica | Southern Ocean	Antarctica	Southern Ocean	Duse Bay	3981	RRS James Clark Ross JR17003a | site Duse Bay 1000 m | locationID based on SCAR Composite Gazetteer Of Antarctica	en	NHMUK	British Antarctic Survey expedition JR17003a	PreservedSpecimen	burrowing	medium
JR17003_NHM_032	JR17003_NHM_032	Adrian G Glover | Thomas G Dahlgren	Maldane sarsi	Regan Drennan	1	unknown	adult	unknown	native	present	specimen stored in 80% non-denatured ethanol aqueous solution	in collection	Animalia	Annelida	Polychaeta		Maldanidae		Maldane	Maldane sarsi	Malmgren, 1865	urn:lsid:marinespecies.org:taxname:130305	species	Preliminary identification, molecular identification to follow	4	JR17003a_1_4	2018-03-01	16:23:00	Agassiz Trawl	-63.5755	-57.2954	WGS84	1080.63	Antarctica | Southern Ocean	Antarctica	Southern Ocean	Duse Bay	3981	RRS James Clark Ross JR17003a | site Duse Bay 1000 m | locationID based on SCAR Composite Gazetteer Of Antarctica	en	NHMUK	British Antarctic Survey expedition JR17003a	PreservedSpecimen	burrowing	medium
JR17003_NHM_033	JR17003_NHM_033	Adrian G Glover | Thomas G Dahlgren	Paranaitis bowersi	Regan Drennan	1	unknown	adult	unknown	native	present	specimen stored in 80% non-denatured ethanol aqueous solution	in collection	Animalia	Annelida	Polychaeta		Phyllodocidae		Paranaitis	Paranaitis bowersi	(Benham, 1927)	urn:lsid:marinespecies.org:taxname:174233	species	Preliminary identification, molecular identification to follow	4	JR17003a_1_4	2018-03-01	16:23:00	Agassiz Trawl	-63.5755	-57.2954	WGS84	1080.63	Antarctica | Southern Ocean	Antarctica	Southern Ocean	Duse Bay	3981	RRS James Clark Ross JR17003a | site Duse Bay 1000 m | locationID based on SCAR Composite Gazetteer Of Antarctica	en	NHMUK	British Antarctic Survey expedition JR17003a	PreservedSpecimen	motile surface-dwelling omnivorous	medium
JR17003_NHM_035	JR17003_NHM_035	Adrian G Glover | Thomas G Dahlgren	Cirratulidae sp. NHM_035	Regan Drennan	1	unknown	adult	unknown	native	present	specimen stored in 80% non-denatured ethanol aqueous solution	in collection	Animalia	Annelida	Polychaeta		Cirratulidae			Cirratulidae	Ryckholt, 1851	urn:lsid:marinespecies.org:taxname:919	family	Preliminary identification, molecular identification to follow | sp. NHM_035	4	JR17003a_1_4	2018-03-01	16:23:00	Agassiz Trawl	-63.5755	-57.2954	WGS84	1080.63	Antarctica | Southern Ocean	Antarctica	Southern Ocean	Duse Bay	3981	RRS James Clark Ross JR17003a | site Duse Bay 1000 m | locationID based on SCAR Composite Gazetteer Of Antarctica	en	NHMUK	British Antarctic Survey expedition JR17003a	PreservedSpecimen	burrowing	small
JR17003_NHM_039A	JR17003_NHM_039A	Adrian G Glover | Thomas G Dahlgren	Maldane sarsi	Regan Drennan	59	unknown	adult	unknown	native	present	specimen stored in 80% non-denatured ethanol aqueous solution	in collection	Animalia	Annelida	Polychaeta		Maldanidae		Maldane	Maldane sarsi	Malmgren, 1865	urn:lsid:marinespecies.org:taxname:130305	species	Preliminary identification, molecular identification to follow	4	JR17003a_1_4	2018-03-01	16:23:00	Agassiz Trawl	-63.5755	-57.2954	WGS84	1080.63	Antarctica | Southern Ocean	Antarctica	Southern Ocean	Duse Bay	3981	RRS James Clark Ross JR17003a | site Duse Bay 1000 m | locationID based on SCAR Composite Gazetteer Of Antarctica	en	NHMUK	British Antarctic Survey expedition JR17003a	PreservedSpecimen	burrowing	medium
JR17003_NHM_039B	JR17003_NHM_039B	Adrian G Glover | Thomas G Dahlgren	Sternaspis sendalli	Regan Drennan	5	unknown	adult	unknown	native	present	specimen stored in 80% non-denatured ethanol aqueous solution	in collection	Animalia	Annelida	Polychaeta		Sternaspidae		Sternaspis	Sternaspis sendalli	Salazar-Vallejo, 2014	urn:lsid:marinespecies.org:taxname:817290	species	Preliminary identification, molecular identification to follow	4	JR17003a_1_4	2018-03-01	16:23:00	Agassiz Trawl	-63.5755	-57.2954	WGS84	1080.63	Antarctica | Southern Ocean	Antarctica	Southern Ocean	Duse Bay	3981	RRS James Clark Ross JR17003a | site Duse Bay 1000 m | locationID based on SCAR Composite Gazetteer Of Antarctica	en	NHMUK	British Antarctic Survey expedition JR17003a	PreservedSpecimen	burrowing	small
JR17003_NHM_039C	JR17003_NHM_039C	Adrian G Glover | Thomas G Dahlgren	Maldanidae sp. NHM_125	Regan Drennan	1	unknown	adult	unknown	native	present	specimen stored in 80% non-denatured ethanol aqueous solution	in collection	Animalia	Annelida	Polychaeta		Maldanidae			Maldanidae	Malmgren, 1867	urn:lsid:marinespecies.org:taxname:923	family	Preliminary identification, molecular identification to follow | sp. NHM_125	4	JR17003a_1_4	2018-03-01	16:23:00	Agassiz Trawl	-63.5755	-57.2954	WGS84	1080.63	Antarctica | Southern Ocean	Antarctica	Southern Ocean	Duse Bay	3981	RRS James Clark Ross JR17003a | site Duse Bay 1000 m | locationID based on SCAR Composite Gazetteer Of Antarctica	en	NHMUK	British Antarctic Survey expedition JR17003a	PreservedSpecimen	burrowing	medium
JR17003_NHM_039D	JR17003_NHM_039D	Adrian G Glover | Thomas G Dahlgren	Augeneria tentaculata	Regan Drennan	1	unknown	adult	unknown	native	present	specimen stored in 80% non-denatured ethanol aqueous solution	in collection	Animalia	Annelida	Polychaeta		Lumbrineridae		Augeneria	Augeneria tentaculata	Monro, 1930	urn:lsid:marinespecies.org:taxname:130225	species	Preliminary identification, molecular identification to follow	4	JR17003a_1_4	2018-03-01	16:23:00	Agassiz Trawl	-63.5755	-57.2954	WGS84	1080.63	Antarctica | Southern Ocean	Antarctica	Southern Ocean	Duse Bay	3981	RRS James Clark Ross JR17003a | site Duse Bay 1000 m | locationID based on SCAR Composite Gazetteer Of Antarctica	en	NHMUK	British Antarctic Survey expedition JR17003a	PreservedSpecimen	burrowing	medium
JR17003_NHM_039E	JR17003_NHM_039E	Adrian G Glover | Thomas G Dahlgren	Terebellidae sp NHM_142	Regan Drennan	1	unknown	adult	unknown	native	present	specimen stored in 80% non-denatured ethanol aqueous solution	in collection	Animalia	Annelida	Polychaeta		Terebellidae			Terebellidae	Johnston, 1846	urn:lsid:marinespecies.org:taxname:982	family	Preliminary identification, molecular identification to follow | sp. NHM_142	4	JR17003a_1_4	2018-03-01	16:23:00	Agassiz Trawl	-63.5755	-57.2954	WGS84	1080.63	Antarctica | Southern Ocean	Antarctica	Southern Ocean	Duse Bay	3981	RRS James Clark Ross JR17003a | site Duse Bay 1000 m | locationID based on SCAR Composite Gazetteer Of Antarctica	en	NHMUK	British Antarctic Survey expedition JR17003a	PreservedSpecimen	tube-building surface deposit feeding	medium
JR17003_NHM_123	JR17003_NHM_123	Adrian G Glover | Thomas G Dahlgren	Myzostoma cf. divisor NHM_123	Regan Drennan	1	unknown	adult	unknown	native	present	specimen stored in 80% non-denatured ethanol aqueous solution	in collection	Animalia	Annelida	Polychaeta		Myzostomidae		Myzostoma	Myzostoma	Leuckart, 1836	urn:lsid:marinespecies.org:taxname:329407	genus	Preliminary identification, molecular identification to follow | Myzostoma cf. divisor sp. NHM_123	38	JR17003a_4_38	2018-03-05	13:47:00	Agassiz Trawl	-64.0551	-58.4765	WGS84	868.42	Antarctica | Southern Ocean	Antarctica	Southern Ocean	Prince Gustav Channel	11614	RRS James Clark Ross JR17003a | site PGC South 800 m | locationID based on SCAR Composite Gazetteer Of Antarctica	en	NHMUK	British Antarctic Survey expedition JR17003a	PreservedSpecimen	parasitic	small
JR17003_NHM_124	JR17003_NHM_124	Adrian G Glover | Thomas G Dahlgren	Augeneria tentaculata	Regan Drennan	1	unknown	adult	unknown	native	present	specimen stored in 80% non-denatured ethanol aqueous solution	in collection	Animalia	Annelida	Polychaeta		Lumbrineridae		Augeneria	Augeneria tentaculata	Monro, 1930	urn:lsid:marinespecies.org:taxname:130225	species	Preliminary identification, molecular identification to follow	38	JR17003a_4_38	2018-03-05	13:47:00	Agassiz Trawl	-64.0551	-58.4765	WGS84	868.42	Antarctica | Southern Ocean	Antarctica	Southern Ocean	Prince Gustav Channel	11614	RRS James Clark Ross JR17003a | site PGC South 800 m | locationID based on SCAR Composite Gazetteer Of Antarctica	en	NHMUK	British Antarctic Survey expedition JR17003a	PreservedSpecimen	burrowing	medium
JR17003_NHM_125	JR17003_NHM_125	Adrian G Glover | Thomas G Dahlgren	Maldanidae sp. NHM_125	Regan Drennan	1	unknown	adult	unknown	native	present	specimen stored in 80% non-denatured ethanol aqueous solution	in collection	Animalia	Annelida	Polychaeta		Maldanidae			Maldanidae	Malmgren, 1867	urn:lsid:marinespecies.org:taxname:923	family	Preliminary identification, molecular identification to follow | sp. NHM_125	38	JR17003a_4_38	2018-03-05	13:47:00	Agassiz Trawl	-64.0551	-58.4765	WGS84	868.42	Antarctica | Southern Ocean	Antarctica	Southern Ocean	Prince Gustav Channel	11614	RRS James Clark Ross JR17003a | site PGC South 800 m | locationID based on SCAR Composite Gazetteer Of Antarctica	en	NHMUK	British Antarctic Survey expedition JR17003a	PreservedSpecimen	burrowing	medium
JR17003_NHM_126	JR17003_NHM_126	Adrian G Glover | Thomas G Dahlgren	Lumbriclymenella robusta	Regan Drennan	1	unknown	adult	unknown	native	present	specimen stored in 80% non-denatured ethanol aqueous solution	in collection	Animalia	Annelida	Polychaeta		Maldanidae		Lumbriclymenella	Lumbriclymenella robusta	Arwidsson, 1911	urn:lsid:marinespecies.org:taxname:173613	species	Preliminary identification, molecular identification to follow	38	JR17003a_4_38	2018-03-05	13:47:00	Agassiz Trawl	-64.0551	-58.4765	WGS84	868.42	Antarctica | Southern Ocean	Antarctica	Southern Ocean	Prince Gustav Channel	11614	RRS James Clark Ross JR17003a | site PGC South 800 m | locationID based on SCAR Composite Gazetteer Of Antarctica	en	NHMUK	British Antarctic Survey expedition JR17003a	PreservedSpecimen	burrowing	large
JR17003_NHM_127	JR17003_NHM_127	Adrian G Glover | Thomas G Dahlgren	Polyeunoa laevis	Regan Drennan	1	unknown	adult	unknown	native	present	specimen stored in 80% non-denatured ethanol aqueous solution	in collection	Animalia	Annelida	Polychaeta		Polynoidae		Polyeunoa	Polyeunoa laevis	McIntosh, 1885	urn:lsid:marinespecies.org:taxname:174391	species	Preliminary identification, molecular identification to follow	38	JR17003a_4_38	2018-03-05	13:47:00	Agassiz Trawl	-64.0551	-58.4765	WGS84	868.42	Antarctica | Southern Ocean	Antarctica	Southern Ocean	Prince Gustav Channel	11614	RRS James Clark Ross JR17003a | site PGC South 800 m | locationID based on SCAR Composite Gazetteer Of Antarctica	en	NHMUK	British Antarctic Survey expedition JR17003a	PreservedSpecimen	motile surface-dwelling omnivorous	large
JR17003_NHM_129	JR17003_NHM_129	Adrian G Glover | Thomas G Dahlgren	Harmothoe fuligineum	Regan Drennan	1	unknown	adult	unknown	native	present	specimen stored in 80% non-denatured ethanol aqueous solution	in collection	Animalia	Annelida	Polychaeta		Polynoidae		Harmothoe	Harmothoe fuligineum	(Baird, 1865)	urn:lsid:marinespecies.org:taxname:445268	species	Preliminary identification, molecular identification to follow	38	JR17003a_4_38	2018-03-05	13:47:00	Agassiz Trawl	-64.0551	-58.4765	WGS84	868.42	Antarctica | Southern Ocean	Antarctica	Southern Ocean	Prince Gustav Channel	11614	RRS James Clark Ross JR17003a | site PGC South 800 m | locationID based on SCAR Composite Gazetteer Of Antarctica	en	NHMUK	British Antarctic Survey expedition JR17003a	PreservedSpecimen	motile surface-dwelling omnivorous	large
JR17003_NHM_130	JR17003_NHM_130	Adrian G Glover | Thomas G Dahlgren	Antarctinoe ferox	Regan Drennan	1	unknown	adult	unknown	native	present	specimen stored in 80% non-denatured ethanol aqueous solution	in collection	Animalia	Annelida	Polychaeta		Polynoidae		Antarctinoe	Antarctinoe ferox	(Baird, 1865)	urn:lsid:marinespecies.org:taxname:236689	species	Preliminary identification, molecular identification to follow	38	JR17003a_4_38	2018-03-05	13:47:00	Agassiz Trawl	-64.0551	-58.4765	WGS84	868.42	Antarctica | Southern Ocean	Antarctica	Southern Ocean	Prince Gustav Channel	11614	RRS James Clark Ross JR17003a | site PGC South 800 m | locationID based on SCAR Composite Gazetteer Of Antarctica	en	NHMUK	British Antarctic Survey expedition JR17003a	PreservedSpecimen	motile surface-dwelling omnivorous	medium
JR17003_NHM_131	JR17003_NHM_131	Adrian G Glover | Thomas G Dahlgren	Tomopteris sp. NHM_131	Regan Drennan	1	unknown	adult	unknown	native	present	specimen stored in 80% non-denatured ethanol aqueous solution	in collection	Animalia	Annelida	Polychaeta		Tomopteridae		Tomopteris	Tomopteris	Eschscholtz, 1825	urn:lsid:marinespecies.org:taxname:129715	genus	Preliminary identification, molecular identification to follow | sp. NHM_131	38	JR17003a_4_38	2018-03-05	13:47:00	Agassiz Trawl	-64.0551	-58.4765	WGS84	868.42	Antarctica | Southern Ocean	Antarctica	Southern Ocean	Prince Gustav Channel	11614	RRS James Clark Ross JR17003a | site PGC South 800 m | locationID based on SCAR Composite Gazetteer Of Antarctica	en	NHMUK	British Antarctic Survey expedition JR17003a	PreservedSpecimen	pelagic	medium
JR17003_NHM_132	JR17003_NHM_132	Adrian G Glover | Thomas G Dahlgren	Travisia kerguelensis	Regan Drennan	1	unknown	adult	unknown	native	present	specimen stored in 80% non-denatured ethanol aqueous solution	in collection	Animalia	Annelida	Polychaeta		Travisiidae		Travisia kerguelensis	Travisia kerguelensis	McIntosh, 1885	urn:lsid:marinespecies.org:taxname:173920	species	Preliminary identification, molecular identification to follow	38	JR17003a_4_38	2018-03-05	13:47:00	Agassiz Trawl	-64.0551	-58.4765	WGS84	868.42	Antarctica | Southern Ocean	Antarctica	Southern Ocean	Prince Gustav Channel	11614	RRS James Clark Ross JR17003a | site PGC South 800 m | locationID based on SCAR Composite Gazetteer Of Antarctica	en	NHMUK	British Antarctic Survey expedition JR17003a	PreservedSpecimen	burrowing	medium
JR17003_NHM_133	JR17003_NHM_133	Adrian G Glover | Thomas G Dahlgren	Maldane sarsi	Regan Drennan	1	unknown	adult	unknown	native	present	specimen stored in 80% non-denatured ethanol aqueous solution	in collection	Animalia	Annelida	Polychaeta		Maldanidae		Maldane	Maldane sarsi	Malmgren, 1865	urn:lsid:marinespecies.org:taxname:130305	species	Preliminary identification, molecular identification to follow	38	JR17003a_4_38	2018-03-05	13:47:00	Agassiz Trawl	-64.0551	-58.4765	WGS84	868.42	Antarctica | Southern Ocean	Antarctica	Southern Ocean	Prince Gustav Channel	11614	RRS James Clark Ross JR17003a | site PGC South 800 m | locationID based on SCAR Composite Gazetteer Of Antarctica	en	NHMUK	British Antarctic Survey expedition JR17003a	PreservedSpecimen	burrowing	medium
JR17003_NHM_134	JR17003_NHM_134	Adrian G Glover | Thomas G Dahlgren	Pionosyllis kerguelensis	Regan Drennan	1	unknown	adult	unknown	native	present	specimen stored in 80% non-denatured ethanol aqueous solution	in collection	Animalia	Annelida	Polychaeta		Syllidae		Pionosyllis	Pionosyllis kerguelensis	(McIntosh, 1885)	urn:lsid:marinespecies.org:taxname:761615	species	Preliminary identification, molecular identification to follow	38	JR17003a_4_38	2018-03-05	13:47:00	Agassiz Trawl	-64.0551	-58.4765	WGS84	868.42	Antarctica | Southern Ocean	Antarctica	Southern Ocean	Prince Gustav Channel	11614	RRS James Clark Ross JR17003a | site PGC South 800 m | locationID based on SCAR Composite Gazetteer Of Antarctica	en	NHMUK	British Antarctic Survey expedition JR17003a	PreservedSpecimen	motile surface-dwelling omnivorous	small
JR17003_NHM_135	JR17003_NHM_135	Adrian G Glover | Thomas G Dahlgren	Maldane sarsi	Regan Drennan	1	unknown	adult	unknown	native	present	specimen stored in 80% non-denatured ethanol aqueous solution	in collection	Animalia	Annelida	Polychaeta		Maldanidae		Maldane	Maldane sarsi	Malmgren, 1865	urn:lsid:marinespecies.org:taxname:130305	species	Preliminary identification, molecular identification to follow	38	JR17003a_4_38	2018-03-05	13:47:00	Agassiz Trawl	-64.0551	-58.4765	WGS84	868.42	Antarctica | Southern Ocean	Antarctica	Southern Ocean	Prince Gustav Channel	11614	RRS James Clark Ross JR17003a | site PGC South 800 m | locationID based on SCAR Composite Gazetteer Of Antarctica	en	NHMUK	British Antarctic Survey expedition JR17003a	PreservedSpecimen	burrowing	medium
JR17003_NHM_136	JR17003_NHM_136	Adrian G Glover | Thomas G Dahlgren	Austrolaenilla antarctica	Regan Drennan	1	unknown	adult	unknown	native	present	specimen stored in 80% non-denatured ethanol aqueous solution	in collection	Animalia	Annelida	Polychaeta		Polynoidae		Austrolaenilla	Austrolaenilla antarctica	Bergström, 1916	urn:lsid:marinespecies.org:taxname:155221	species	Preliminary identification, molecular identification to follow	38	JR17003a_4_38	2018-03-05	13:47:00	Agassiz Trawl	-64.0551	-58.4765	WGS84	868.42	Antarctica | Southern Ocean	Antarctica	Southern Ocean	Prince Gustav Channel	11614	RRS James Clark Ross JR17003a | site PGC South 800 m | locationID based on SCAR Composite Gazetteer Of Antarctica	en	NHMUK	British Antarctic Survey expedition JR17003a	PreservedSpecimen	motile surface-dwelling omnivorous	medium
JR17003_NHM_140A	JR17003_NHM_140A	Adrian G Glover | Thomas G Dahlgren	Maldane sarsi	Regan Drennan	11	unknown	adult	unknown	native	present	specimen stored in 80% non-denatured ethanol aqueous solution	in collection	Animalia	Annelida	Polychaeta		Maldanidae		Maldane	Maldane sarsi	Malmgren, 1865	urn:lsid:marinespecies.org:taxname:130305	species	Preliminary identification, molecular identification to follow	38	JR17003a_4_38	2018-03-05	13:47:00	Agassiz Trawl	-64.0551	-58.4765	WGS84	868.42	Antarctica | Southern Ocean	Antarctica	Southern Ocean	Prince Gustav Channel	11614	RRS James Clark Ross JR17003a | site PGC South 800 m | locationID based on SCAR Composite Gazetteer Of Antarctica	en	NHMUK	British Antarctic Survey expedition JR17003a	PreservedSpecimen	burrowing	medium
JR17003_NHM_140B	JR17003_NHM_140B	Adrian G Glover | Thomas G Dahlgren	Maldanidae sp. NHM_125	Regan Drennan	1	unknown	adult	unknown	native	present	specimen stored in 80% non-denatured ethanol aqueous solution	in collection	Animalia	Annelida	Polychaeta		Maldanidae			Maldanidae	Malmgren, 1867	urn:lsid:marinespecies.org:taxname:923	family	Preliminary identification, molecular identification to follow | sp. NHM_125	38	JR17003a_4_38	2018-03-05	13:47:00	Agassiz Trawl	-64.0551	-58.4765	WGS84	868.42	Antarctica | Southern Ocean	Antarctica	Southern Ocean	Prince Gustav Channel	11614	RRS James Clark Ross JR17003a | site PGC South 800 m | locationID based on SCAR Composite Gazetteer Of Antarctica	en	NHMUK	British Antarctic Survey expedition JR17003a	PreservedSpecimen	burrowing	medium
JR17003_NHM_140C	JR17003_NHM_140C	Adrian G Glover | Thomas G Dahlgren	Lumbriclymenella robusta	Regan Drennan	1	unknown	adult	unknown	native	present	specimen stored in 80% non-denatured ethanol aqueous solution	in collection	Animalia	Annelida	Polychaeta		Maldanidae		Lumbriclymenella	Lumbriclymenella robusta	Arwidsson, 1911	urn:lsid:marinespecies.org:taxname:173613	species	Preliminary identification, molecular identification to follow	38	JR17003a_4_38	2018-03-05	13:47:00	Agassiz Trawl	-64.0551	-58.4765	WGS84	868.42	Antarctica | Southern Ocean	Antarctica	Southern Ocean	Prince Gustav Channel	11614	RRS James Clark Ross JR17003a | site PGC South 800 m | locationID based on SCAR Composite Gazetteer Of Antarctica	en	NHMUK	British Antarctic Survey expedition JR17003a	PreservedSpecimen	burrowing	medium
JR17003_NHM_140D	JR17003_NHM_140D	Adrian G Glover | Thomas G Dahlgren	Polynoidae. sp. NHM_140D	Regan Drennan	1	unknown	adult	unknown	native	present	specimen stored in 80% non-denatured ethanol aqueous solution	in collection	Animalia	Annelida	Polychaeta		Polynoidae			Polynoidae	Kinberg, 1856	urn:lsid:marinespecies.org:taxname:939	family	Preliminary identification, molecular identification to follow |sp. NHM_140D	38	JR17003a_4_38	2018-03-05	13:47:00	Agassiz Trawl	-64.0551	-58.4765	WGS84	868.42	Antarctica | Southern Ocean	Antarctica	Southern Ocean	Prince Gustav Channel	11614	RRS James Clark Ross JR17003a | site PGC South 800 m | locationID based on SCAR Composite Gazetteer Of Antarctica	en	NHMUK	British Antarctic Survey expedition JR17003a	PreservedSpecimen	motile surface-dwelling omnivorous	medium
JR17003_NHM_140E	JR17003_NHM_140E	Adrian G Glover | Thomas G Dahlgren	Sternaspis sendalli	Regan Drennan	1	unknown	adult	unknown	native	present	specimen stored in 80% non-denatured ethanol aqueous solution	in collection	Animalia	Annelida	Polychaeta		Sternaspidae		Sternaspis	Sternaspis sendalli	Salazar-Vallejo, 2014	urn:lsid:marinespecies.org:taxname:817290	species	Preliminary identification, molecular identification to follow	38	JR17003a_4_38	2018-03-05	13:47:00	Agassiz Trawl	-64.0551	-58.4765	WGS84	868.42	Antarctica | Southern Ocean	Antarctica	Southern Ocean	Prince Gustav Channel	11614	RRS James Clark Ross JR17003a | site PGC South 800 m | locationID based on SCAR Composite Gazetteer Of Antarctica	en	NHMUK	British Antarctic Survey expedition JR17003a	PreservedSpecimen	burrowing	small
JR17003_NHM_140F	JR17003_NHM_140F	Adrian G Glover | Thomas G Dahlgren	Syllidae sp. NHM_140F	Regan Drennan	1	unknown	adult	unknown	native	present	specimen stored in 80% non-denatured ethanol aqueous solution	in collection	Animalia	Annelida	Polychaeta		Syllidae			Syllidae	Grube, 1850	urn:lsid:marinespecies.org:taxname:948	family	Preliminary identification, molecular identification to follow | sp. NHM_140F	38	JR17003a_4_38	2018-03-05	13:47:00	Agassiz Trawl	-64.0551	-58.4765	WGS84	868.42	Antarctica | Southern Ocean	Antarctica	Southern Ocean	Prince Gustav Channel	11614	RRS James Clark Ross JR17003a | site PGC South 800 m | locationID based on SCAR Composite Gazetteer Of Antarctica	en	NHMUK	British Antarctic Survey expedition JR17003a	PreservedSpecimen	motile surface-dwelling omnivorous	small
JR17003_NHM_140G	JR17003_NHM_140G	Adrian G Glover | Thomas G Dahlgren	Terebellidae sp. NHM_234P	Regan Drennan	1	unknown	adult	unknown	native	present	specimen stored in 80% non-denatured ethanol aqueous solution	in collection	Animalia	Annelida	Polychaeta		Terebellidae			Terebellidae	Johnston, 1846	urn:lsid:marinespecies.org:taxname:982	family	Preliminary identification, molecular identification to follow | sp. NHM_234P	38	JR17003a_4_38	2018-03-05	13:47:00	Agassiz Trawl	-64.0551	-58.4765	WGS84	868.42	Antarctica | Southern Ocean	Antarctica	Southern Ocean	Prince Gustav Channel	11614	RRS James Clark Ross JR17003a | site PGC South 800 m | locationID based on SCAR Composite Gazetteer Of Antarctica	en	NHMUK	British Antarctic Survey expedition JR17003a	PreservedSpecimen	tube-building surface deposit feeding	medium
JR17003_NHM_141A	JR17003_NHM_141A	Adrian G Glover | Thomas G Dahlgren	Ampharetidae sp. NHM_280A	Regan Drennan	1	unknown	adult	unknown	native	present	specimen stored in 80% non-denatured ethanol aqueous solution	in collection	Animalia	Annelida	Polychaeta		Ampharetidae			Ampharetidae	Malmgren, 1866	urn:lsid:marinespecies.org:taxname:981	family	Preliminary identification, molecular identification to follow | sp. NHM_280A	38	JR17003a_4_38	2018-03-05	13:47:00	Agassiz Trawl	-64.0551	-58.4765	WGS84	868.42	Antarctica | Southern Ocean	Antarctica	Southern Ocean	Prince Gustav Channel	11614	RRS James Clark Ross JR17003a | site PGC South 800 m | locationID based on SCAR Composite Gazetteer Of Antarctica	en	NHMUK	British Antarctic Survey expedition JR17003a	PreservedSpecimen	tube-building surface deposit feeding	large
JR17003_NHM_141B	JR17003_NHM_141B	Adrian G Glover | Thomas G Dahlgren	Maldanidae sp. NHM_125	Regan Drennan	1	unknown	adult	unknown	native	present	specimen stored in 80% non-denatured ethanol aqueous solution	in collection	Animalia	Annelida	Polychaeta		Maldanidae			Maldanidae	Malmgren, 1867	urn:lsid:marinespecies.org:taxname:923	family	Preliminary identification, molecular identification to follow | sp. NHM_125	38	JR17003a_4_38	2018-03-05	13:47:00	Agassiz Trawl	-64.0551	-58.4765	WGS84	868.42	Antarctica | Southern Ocean	Antarctica	Southern Ocean	Prince Gustav Channel	11614	RRS James Clark Ross JR17003a | site PGC South 800 m | locationID based on SCAR Composite Gazetteer Of Antarctica	en	NHMUK	British Antarctic Survey expedition JR17003a	PreservedSpecimen	burrowing	medium
JR17003_NHM_141C	JR17003_NHM_141C	Adrian G Glover | Thomas G Dahlgren	Lumbriclymenella robusta	Regan Drennan	3	unknown	adult	unknown	native	present	specimen stored in 80% non-denatured ethanol aqueous solution	in collection	Animalia	Annelida	Polychaeta		Maldanidae		Lumbriclymenella	Lumbriclymenella robusta	Arwidsson, 1911	urn:lsid:marinespecies.org:taxname:173613	species	Preliminary identification, molecular identification to follow	38	JR17003a_4_38	2018-03-05	13:47:00	Agassiz Trawl	-64.0551	-58.4765	WGS84	868.42	Antarctica | Southern Ocean	Antarctica	Southern Ocean	Prince Gustav Channel	11614	RRS James Clark Ross JR17003a | site PGC South 800 m | locationID based on SCAR Composite Gazetteer Of Antarctica	en	NHMUK	British Antarctic Survey expedition JR17003a	PreservedSpecimen	burrowing	medium
JR17003_NHM_141D	JR17003_NHM_141D	Adrian G Glover | Thomas G Dahlgren	Polynoidae sp. NHM_140D	Regan Drennan	1	unknown	adult	unknown	native	present	specimen stored in 80% non-denatured ethanol aqueous solution	in collection	Animalia	Annelida	Polychaeta		Polynoidae			Polynoidae	Kinberg, 1856	urn:lsid:marinespecies.org:taxname:939	family	Preliminary identification, molecular identification to follow | sp. NHM_140D	38	JR17003a_4_38	2018-03-05	13:47:00	Agassiz Trawl	-64.0551	-58.4765	WGS84	868.42	Antarctica | Southern Ocean	Antarctica	Southern Ocean	Prince Gustav Channel	11614	RRS James Clark Ross JR17003a | site PGC South 800 m | locationID based on SCAR Composite Gazetteer Of Antarctica	en	NHMUK	British Antarctic Survey expedition JR17003a	PreservedSpecimen	motile surface-dwelling omnivorous	small
JR17003_NHM_141E	JR17003_NHM_141E	Adrian G Glover | Thomas G Dahlgren	Sabellidae sp. NHM_272	Regan Drennan	1	unknown	adult	unknown	native	present	specimen stored in 80% non-denatured ethanol aqueous solution	in collection	Animalia	Annelida	Polychaeta		Sabellidae			Sabellidae	Latreille, 1825	urn:lsid:marinespecies.org:taxname:985	family	Preliminary identification, molecular identification to follow | sp. NHM_272	38	JR17003a_4_38	2018-03-05	13:47:00	Agassiz Trawl	-64.0551	-58.4765	WGS84	868.42	Antarctica | Southern Ocean	Antarctica	Southern Ocean	Prince Gustav Channel	11614	RRS James Clark Ross JR17003a | site PGC South 800 m | locationID based on SCAR Composite Gazetteer Of Antarctica	en	NHMUK	British Antarctic Survey expedition JR17003a	PreservedSpecimen	tube building suspension feeding	medium
JR17003_NHM_141F	JR17003_NHM_141F	Adrian G Glover | Thomas G Dahlgren	Syllidae sp. NHM_140F	Regan Drennan	3	unknown	adult	unknown	native	present	specimen stored in 80% non-denatured ethanol aqueous solution	in collection	Animalia	Annelida	Polychaeta		Syllidae			Syllidae	Grube, 1850	urn:lsid:marinespecies.org:taxname:948	family	Preliminary identification, molecular identification to follow | sp. NHM_140F	38	JR17003a_4_38	2018-03-05	13:47:00	Agassiz Trawl	-64.0551	-58.4765	WGS84	868.42	Antarctica | Southern Ocean	Antarctica	Southern Ocean	Prince Gustav Channel	11614	RRS James Clark Ross JR17003a | site PGC South 800 m | locationID based on SCAR Composite Gazetteer Of Antarctica	en	NHMUK	British Antarctic Survey expedition JR17003a	PreservedSpecimen	motile surface-dwelling omnivorous	small
JR17003_NHM_142	JR17003_NHM_142	Adrian G Glover | Thomas G Dahlgren	Terebellidae sp. NHM_142	Regan Drennan	1	unknown	adult	unknown	native	present	specimen stored in 80% non-denatured ethanol aqueous solution	in collection	Animalia	Annelida	Polychaeta		Terebellidae			Terebellidae	Johnston, 1846	urn:lsid:marinespecies.org:taxname:982	family	Preliminary identification, molecular identification to follow | sp. NHM_142	38	JR17003a_4_38	2018-03-05	13:47:00	Agassiz Trawl	-64.0551	-58.4765	WGS84	868.42	Antarctica | Southern Ocean	Antarctica	Southern Ocean	Prince Gustav Channel	11614	RRS James Clark Ross JR17003a | site PGC South 800 m | locationID based on SCAR Composite Gazetteer Of Antarctica	en	NHMUK	British Antarctic Survey expedition JR17003a	PreservedSpecimen	tube-building surface deposit feeding	medium
JR17003_NHM_200	JR17003_NHM_200	Adrian G Glover | Thomas G Dahlgren	Brada mammilata	Regan Drennan	1	unknown	adult	unknown	native	present	specimen stored in 80% non-denatured ethanol aqueous solution	in collection	Animalia	Annelida	Polychaeta		Flabelligeridae		Brada	Brada mammilata	Grube, 1877	urn:lsid:marinespecies.org:taxname:173298	species	Preliminary identification, molecular identification to follow	43	JR17003a_6_43	2018-03-06	09:07:00	Agassiz Trawl	-63.9881	-58.4225	WGS84	1271.42	Antarctica | Southern Ocean	Antarctica	Southern Ocean	Prince Gustav Channel	11614	RRS James Clark Ross JR17003a |site PGC South 1200 m | locationID based on SCAR Composite Gazetteer Of Antarctica	en	NHMUK	British Antarctic Survey expedition JR17003a	PreservedSpecimen	motile surface deposit feeder	large
JR17003_NHM_201	JR17003_NHM_201	Adrian G Glover | Thomas G Dahlgren	Brada mammilata	Regan Drennan	1	unknown	adult	unknown	native	present	specimen stored in 80% non-denatured ethanol aqueous solution	in collection	Animalia	Annelida	Polychaeta		Flabelligeridae		Brada	Brada mammilata	Grube, 1877	urn:lsid:marinespecies.org:taxname:173298	species	Preliminary identification, molecular identification to follow	43	JR17003a_6_43	2018-03-06	09:07:00	Agassiz Trawl	-63.9881	-58.4225	WGS84	1271.42	Antarctica | Southern Ocean	Antarctica	Southern Ocean	Prince Gustav Channel	11614	RRS James Clark Ross JR17003a |site PGC South 1200 m | locationID based on SCAR Composite Gazetteer Of Antarctica	en	NHMUK	British Antarctic Survey expedition JR17003a	PreservedSpecimen	motile surface deposit feeder	large
JR17003_NHM_202	JR17003_NHM_202	Adrian G Glover | Thomas G Dahlgren	Brada mammilata	Regan Drennan	15	unknown	adult	unknown	native	present	specimen stored in 80% non-denatured ethanol aqueous solution	in collection	Animalia	Annelida	Polychaeta		Flabelligeridae		Brada	Brada mammilata	Grube, 1877	urn:lsid:marinespecies.org:taxname:173298	species	Preliminary identification, molecular identification to follow	43	JR17003a_6_43	2018-03-06	09:07:00	Agassiz Trawl	-63.9881	-58.4225	WGS84	1271.42	Antarctica | Southern Ocean	Antarctica	Southern Ocean	Prince Gustav Channel	11614	RRS James Clark Ross JR17003a |site PGC South 1200 m | locationID based on SCAR Composite Gazetteer Of Antarctica	en	NHMUK	British Antarctic Survey expedition JR17003a	PreservedSpecimen	motile surface deposit feeder	*13 large 2 medium
JR17003_NHM_203	JR17003_NHM_203	Adrian G Glover | Thomas G Dahlgren	Austrolaenilla antarctica	Regan Drennan	1	unknown	adult	unknown	native	present	specimen stored in 80% non-denatured ethanol aqueous solution	in collection	Animalia	Annelida	Polychaeta		Polynoidae		Austrolaenilla	Austrolaenilla antarctica	Bergström, 1916	urn:lsid:marinespecies.org:taxname:155221	species	Preliminary identification, molecular identification to follow	43	JR17003a_6_43	2018-03-06	09:07:00	Agassiz Trawl	-63.9881	-58.4225	WGS84	1271.42	Antarctica | Southern Ocean	Antarctica	Southern Ocean	Prince Gustav Channel	11614	RRS James Clark Ross JR17003a |site PGC South 1200 m | locationID based on SCAR Composite Gazetteer Of Antarctica	en	NHMUK	British Antarctic Survey expedition JR17003a	PreservedSpecimen	motile surface-dwelling omnivorous	medium
JR17003_NHM_204	JR17003_NHM_204	Adrian G Glover | Thomas G Dahlgren	Aglaophamus trissophyllus	Regan Drennan	1	unknown	adult	unknown	native	present	specimen stored in 80% non-denatured ethanol aqueous solution	in collection	Animalia	Annelida	Polychaeta		Nephtyidae		Aglaophamus	Aglaophamus trissophyllus	(Grube, 1877)	urn:lsid:marinespecies.org:taxname:173693	species	Preliminary identification, molecular identification to follow	43	JR17003a_6_43	2018-03-06	09:07:00	Agassiz Trawl	-63.9881	-58.4225	WGS84	1271.42	Antarctica | Southern Ocean	Antarctica	Southern Ocean	Prince Gustav Channel	11614	RRS James Clark Ross JR17003a |site PGC South 1200 m | locationID based on SCAR Composite Gazetteer Of Antarctica	en	NHMUK	British Antarctic Survey expedition JR17003a	PreservedSpecimen	motile surface-dwelling omnivorous	large
JR17003_NHM_205	JR17003_NHM_205	Adrian G Glover | Thomas G Dahlgren	Antarctinoe cf. ferox NHM_232	Regan Drennan	1	unknown	adult	unknown	native	present	specimen stored in 80% non-denatured ethanol aqueous solution	in collection	Animalia	Annelida	Polychaeta		Polynoidae		Antarctinoe	Antarctinoe	Barnich, Fiege, Micaletto & Gambi, 2006	urn:lsid:marinespecies.org:taxname:236657	genus	Preliminary identification, molecular identification to follow | Antarctinoe cf. ferox sp. NHM_232	43	JR17003a_6_43	2018-03-06	09:07:00	Agassiz Trawl	-63.9881	-58.4225	WGS84	1271.42	Antarctica | Southern Ocean	Antarctica	Southern Ocean	Prince Gustav Channel	11614	RRS James Clark Ross JR17003a |site PGC South 1200 m | locationID based on SCAR Composite Gazetteer Of Antarctica	en	NHMUK	British Antarctic Survey expedition JR17003a	PreservedSpecimen	motile surface-dwelling omnivorous	medium
JR17003_NHM_206	JR17003_NHM_206	Adrian G Glover | Thomas G Dahlgren	Austrolaenilla antarctica	Regan Drennan	1	unknown	adult	unknown	native	present	specimen stored in 80% non-denatured ethanol aqueous solution	in collection	Animalia	Annelida	Polychaeta		Polynoidae		Austrolaenilla	Austrolaenilla antarctica	Bergström, 1916	urn:lsid:marinespecies.org:taxname:155221	species	Preliminary identification, molecular identification to follow	43	JR17003a_6_43	2018-03-06	09:07:00	Agassiz Trawl	-63.9881	-58.4225	WGS84	1271.42	Antarctica | Southern Ocean	Antarctica	Southern Ocean	Prince Gustav Channel	11614	RRS James Clark Ross JR17003a |site PGC South 1200 m | locationID based on SCAR Composite Gazetteer Of Antarctica	en	NHMUK	British Antarctic Survey expedition JR17003a	PreservedSpecimen	motile surface-dwelling omnivorous	medium
JR17003_NHM_207	JR17003_NHM_207	Adrian G Glover | Thomas G Dahlgren	Austrolaenilla antarctica	Regan Drennan	1	unknown	adult	unknown	native	present	specimen stored in 80% non-denatured ethanol aqueous solution	in collection	Animalia	Annelida	Polychaeta		Polynoidae		Austrolaenilla	Austrolaenilla antarctica	Bergström, 1916	urn:lsid:marinespecies.org:taxname:155221	species	Preliminary identification, molecular identification to follow	43	JR17003a_6_43	2018-03-06	09:07:00	Agassiz Trawl	-63.9881	-58.4225	WGS84	1271.42	Antarctica | Southern Ocean	Antarctica	Southern Ocean	Prince Gustav Channel	11614	RRS James Clark Ross JR17003a |site PGC South 1200 m | locationID based on SCAR Composite Gazetteer Of Antarctica	en	NHMUK	British Antarctic Survey expedition JR17003a	PreservedSpecimen	motile surface-dwelling omnivorous	medium
JR17003_NHM_209	JR17003_NHM_209	Adrian G Glover | Thomas G Dahlgren	Austrolaenilla antarctica	Regan Drennan	1	unknown	adult	unknown	native	present	specimen stored in 80% non-denatured ethanol aqueous solution	in collection	Animalia	Annelida	Polychaeta		Polynoidae		Austrolaenilla	Austrolaenilla antarctica	Bergström, 1916	urn:lsid:marinespecies.org:taxname:155221	species	Preliminary identification, molecular identification to follow	43	JR17003a_6_43	2018-03-06	09:07:00	Agassiz Trawl	-63.9881	-58.4225	WGS84	1271.42	Antarctica | Southern Ocean	Antarctica	Southern Ocean	Prince Gustav Channel	11614	RRS James Clark Ross JR17003a |site PGC South 1200 m | locationID based on SCAR Composite Gazetteer Of Antarctica	en	NHMUK	British Antarctic Survey expedition JR17003a	PreservedSpecimen	motile surface-dwelling omnivorous	medium
JR17003_NHM_211	JR17003_NHM_211	Adrian G Glover | Thomas G Dahlgren	Austrolaenilla antarctica	Regan Drennan	1	unknown	adult	unknown	native	present	specimen stored in 80% non-denatured ethanol aqueous solution	in collection	Animalia	Annelida	Polychaeta		Polynoidae		Austrolaenilla	Austrolaenilla antarctica	Bergström, 1916	urn:lsid:marinespecies.org:taxname:155221	species	Preliminary identification, molecular identification to follow	43	JR17003a_6_43	2018-03-06	09:07:00	Agassiz Trawl	-63.9881	-58.4225	WGS84	1271.42	Antarctica | Southern Ocean	Antarctica	Southern Ocean	Prince Gustav Channel	11614	RRS James Clark Ross JR17003a |site PGC South 1200 m | locationID based on SCAR Composite Gazetteer Of Antarctica	en	NHMUK	British Antarctic Survey expedition JR17003a	PreservedSpecimen	motile surface-dwelling omnivorous	medium
JR17003_NHM_212	JR17003_NHM_212	Adrian G Glover | Thomas G Dahlgren	Polyeunoa laevis	Regan Drennan	1	unknown	adult	unknown	native	present	specimen stored in 80% non-denatured ethanol aqueous solution	in collection	Animalia	Annelida	Polychaeta		Polynoidae		Polyeunoa	Polyeunoa laevis	McIntosh, 1885	urn:lsid:marinespecies.org:taxname:174391	species	Preliminary identification, molecular identification to follow	46	JR17003a_9_46	2018-03-06	17:13:00	Agassiz Trawl	-63.806	-58.0652	WGS84	869.95	Antarctica | Southern Ocean	Antarctica	Southern Ocean	Prince Gustav Channel	11614	RRS James Clark Ross JR17003a |site PGC Mid 850 m | locationID based on SCAR Composite Gazetteer Of Antarctica	en	NHMUK	British Antarctic Survey expedition JR17003a	PreservedSpecimen	motile surface-dwelling omnivorous	medium
JR17003_NHM_228	JR17003_NHM_228	Adrian G Glover | Thomas G Dahlgren	Polynoidae sp. NHM_228	Regan Drennan	1	unknown	adult	unknown	native	present	specimen stored in 80% non-denatured ethanol aqueous solution	in collection	Animalia	Annelida	Polychaeta		Polynoidae			Polynoidae	Kinberg, 1856	urn:lsid:marinespecies.org:taxname:939	family	Preliminary identification, molecular identification to follow | sp. NHM_228	46	JR17003a_9_46	2018-03-06	17:13:00	Agassiz Trawl	-63.806	-58.0652	WGS84	869.95	Antarctica | Southern Ocean	Antarctica	Southern Ocean	Prince Gustav Channel	11614	RRS James Clark Ross JR17003a |site PGC Mid 850 m | locationID based on SCAR Composite Gazetteer Of Antarctica	en	NHMUK	British Antarctic Survey expedition JR17003a	PreservedSpecimen	motile surface-dwelling omnivorous	medium
JR17003_NHM_229	JR17003_NHM_229	Adrian G Glover | Thomas G Dahlgren	Polynoidae sp. NHM_228	Regan Drennan	1	unknown	adult	unknown	native	present	specimen stored in 80% non-denatured ethanol aqueous solution	in collection	Animalia	Annelida	Polychaeta		Polynoidae			Polynoidae	Kinberg, 1856	urn:lsid:marinespecies.org:taxname:939	family	Preliminary identification, molecular identification to follow | sp. NHM_228	46	JR17003a_9_46	2018-03-06	17:13:00	Agassiz Trawl	-63.806	-58.0652	WGS84	869.95	Antarctica | Southern Ocean	Antarctica	Southern Ocean	Prince Gustav Channel	11614	RRS James Clark Ross JR17003a |site PGC Mid 850 m | locationID based on SCAR Composite Gazetteer Of Antarctica	en	NHMUK	British Antarctic Survey expedition JR17003a	PreservedSpecimen	motile surface-dwelling omnivorous	medium
JR17003_NHM_230	JR17003_NHM_230	Adrian G Glover | Thomas G Dahlgren	Flabegraviera mundata	Regan Drennan	1	unknown	adult	unknown	native	present	specimen stored in 80% non-denatured ethanol aqueous solution	in collection	Animalia	Annelida	Polychaeta		Flabelligeridae		Flabegraviera	Flabegraviera mundata	(Gravier, 1906)	urn:lsid:marinespecies.org:taxname:934969	species	Preliminary identification, molecular identification to follow	46	JR17003a_9_46	2018-03-06	17:13:00	Agassiz Trawl	-63.806	-58.0652	WGS84	869.95	Antarctica | Southern Ocean	Antarctica	Southern Ocean	Prince Gustav Channel	11614	RRS James Clark Ross JR17003a |site PGC Mid 850 m | locationID based on SCAR Composite Gazetteer Of Antarctica	en	NHMUK	British Antarctic Survey expedition JR17003a	PreservedSpecimen	motile surface deposit feeder	large
JR17003_NHM_231	JR17003_NHM_231	Adrian G Glover | Thomas G Dahlgren	Flabegraviera mundata	Regan Drennan	1	unknown	adult	unknown	native	present	specimen stored in 80% non-denatured ethanol aqueous solution	in collection	Animalia	Annelida	Polychaeta		Flabelligeridae		Flabegraviera	Flabegraviera mundata	(Gravier, 1906)	urn:lsid:marinespecies.org:taxname:934969	species	Preliminary identification, molecular identification to follow	46	JR17003a_9_46	2018-03-06	17:13:00	Agassiz Trawl	-63.806	-58.0652	WGS84	869.95	Antarctica | Southern Ocean	Antarctica	Southern Ocean	Prince Gustav Channel	11614	RRS James Clark Ross JR17003a |site PGC Mid 850 m | locationID based on SCAR Composite Gazetteer Of Antarctica	en	NHMUK	British Antarctic Survey expedition JR17003a	PreservedSpecimen	motile surface deposit feeder	medium
JR17003_NHM_232	JR17003_NHM_232	Adrian G Glover | Thomas G Dahlgren	Antarctinoe cf. ferox NHM_232	Regan Drennan	1	unknown	adult	unknown	native	present	specimen stored in 80% non-denatured ethanol aqueous solution	in collection	Animalia	Annelida	Polychaeta		Polynoidae		Antarctinoe	Antarctinoe	Barnich, Fiege, Micaletto & Gambi, 2006	urn:lsid:marinespecies.org:taxname:236657	genus	Preliminary identification, molecular identification to follow | Antarctinoe cf. ferox sp. NHM_232	46	JR17003a_9_46	2018-03-06	17:13:00	Agassiz Trawl	-63.806	-58.0652	WGS84	869.95	Antarctica | Southern Ocean	Antarctica	Southern Ocean	Prince Gustav Channel	11614	RRS James Clark Ross JR17003a |site PGC Mid 850 m | locationID based on SCAR Composite Gazetteer Of Antarctica	en	NHMUK	British Antarctic Survey expedition JR17003a	PreservedSpecimen	motile surface-dwelling omnivorous	large
JR17003_NHM_233	JR17003_NHM_233	Adrian G Glover | Thomas G Dahlgren	Harmothoe cf. fuligineum NHM_233	Regan Drennan	1	unknown	adult	unknown	native	present	specimen stored in 80% non-denatured ethanol aqueous solution	in collection	Animalia	Annelida	Polychaeta		Polynoidae		Harmothoe	Harmothoe	Kinberg, 1856	urn:lsid:marinespecies.org:taxname:129491	genus	Preliminary identification, molecular identification to follow | Harmothoe cf. fuligineum sp. NHM_233	46	JR17003a_9_46	2018-03-06	17:13:00	Agassiz Trawl	-63.806	-58.0652	WGS84	869.95	Antarctica | Southern Ocean	Antarctica	Southern Ocean	Prince Gustav Channel	11614	RRS James Clark Ross JR17003a |site PGC Mid 850 m | locationID based on SCAR Composite Gazetteer Of Antarctica	en	NHMUK	British Antarctic Survey expedition JR17003a	PreservedSpecimen	motile surface-dwelling omnivorous	medium
JR17003_NHM_234A	JR17003_NHM_234A	Adrian G Glover | Thomas G Dahlgren	Flabegraviera mundata	Regan Drennan	3	unknown	adult	unknown	native	present	specimen stored in 80% non-denatured ethanol aqueous solution	in collection	Animalia	Annelida	Polychaeta		Flabelligeridae		Flabegraviera	Flabegraviera mundata	(Gravier, 1906)	urn:lsid:marinespecies.org:taxname:934969	species	Preliminary identification, molecular identification to follow	46	JR17003a_9_46	2018-03-06	17:13:00	Agassiz Trawl	-63.806	-58.0652	WGS84	869.95	Antarctica | Southern Ocean	Antarctica	Southern Ocean	Prince Gustav Channel	11614	RRS James Clark Ross JR17003a |site PGC Mid 850 m | locationID based on SCAR Composite Gazetteer Of Antarctica	en	NHMUK	British Antarctic Survey expedition JR17003a	PreservedSpecimen	motile surface deposit feeder	medium
JR17003_NHM_234B	JR17003_NHM_234B	Adrian G Glover | Thomas G Dahlgren	Aglaophamus trissophyllus	Regan Drennan	6	unknown	adult	unknown	native	present	specimen stored in 80% non-denatured ethanol aqueous solution	in collection	Animalia	Annelida	Polychaeta		Nephtyidae		Aglaophamus	Aglaophamus trissophyllus	(Grube, 1877)	urn:lsid:marinespecies.org:taxname:173693	species	Preliminary identification, molecular identification to follow	46	JR17003a_9_46	2018-03-06	17:13:00	Agassiz Trawl	-63.806	-58.0652	WGS84	869.95	Antarctica | Southern Ocean	Antarctica	Southern Ocean	Prince Gustav Channel	11614	RRS James Clark Ross JR17003a |site PGC Mid 850 m | locationID based on SCAR Composite Gazetteer Of Antarctica	en	NHMUK	British Antarctic Survey expedition JR17003a	PreservedSpecimen	motile surface-dwelling omnivorous	medium
JR17003_NHM_234C	JR17003_NHM_234C	Adrian G Glover | Thomas G Dahlgren	Oweniidae sp. NHM_234C	Regan Drennan	10	unknown	adult	unknown	native	present	specimen stored in 80% non-denatured ethanol aqueous solution	in collection	Animalia	Annelida	Polychaeta		Oweniidae			Oweniidae	Rioja, 1917	urn:lsid:marinespecies.org:taxname:975	family	Preliminary identification, molecular identification to follow | sp. NHM_234C	46	JR17003a_9_46	2018-03-06	17:13:00	Agassiz Trawl	-63.806	-58.0652	WGS84	869.95	Antarctica | Southern Ocean	Antarctica	Southern Ocean	Prince Gustav Channel	11614	RRS James Clark Ross JR17003a |site PGC Mid 850 m | locationID based on SCAR Composite Gazetteer Of Antarctica	en	NHMUK	British Antarctic Survey expedition JR17003a	PreservedSpecimen	tube-building surface deposit feeding	medium
JR17003_NHM_234D	JR17003_NHM_234D	Adrian G Glover | Thomas G Dahlgren	Phyllodocidae sp. NHM_234D	Regan Drennan	1	unknown	adult	unknown	native	present	specimen stored in 80% non-denatured ethanol aqueous solution	in collection	Animalia	Annelida	Polychaeta		Phyllodocidae			Phyllodocidae	Örsted, 1843	urn:lsid:marinespecies.org:taxname:931	family	Preliminary identification, molecular identification to follow | sp. NHM_234D	46	JR17003a_9_46	2018-03-06	17:13:00	Agassiz Trawl	-63.806	-58.0652	WGS84	869.95	Antarctica | Southern Ocean	Antarctica	Southern Ocean	Prince Gustav Channel	11614	RRS James Clark Ross JR17003a |site PGC Mid 850 m | locationID based on SCAR Composite Gazetteer Of Antarctica	en	NHMUK	British Antarctic Survey expedition JR17003a	PreservedSpecimen	motile surface-dwelling omnivorous	medium
JR17003_NHM_234E	JR17003_NHM_234E	Adrian G Glover | Thomas G Dahlgren	Paranaitis bowersi	Regan Drennan	1	unknown	adult	unknown	native	present	specimen stored in 80% non-denatured ethanol aqueous solution	in collection	Animalia	Annelida	Polychaeta		Phyllodocidae		Paranaitis	Paranaitis bowersi	(Benham, 1927)	urn:lsid:marinespecies.org:taxname:174233	species	Preliminary identification, molecular identification to follow	46	JR17003a_9_46	2018-03-06	17:13:00	Agassiz Trawl	-63.806	-58.0652	WGS84	869.95	Antarctica | Southern Ocean	Antarctica	Southern Ocean	Prince Gustav Channel	11614	RRS James Clark Ross JR17003a |site PGC Mid 850 m | locationID based on SCAR Composite Gazetteer Of Antarctica	en	NHMUK	British Antarctic Survey expedition JR17003a	PreservedSpecimen	motile surface-dwelling omnivorous	medium
JR17003_NHM_234F	JR17003_NHM_234F	Adrian G Glover | Thomas G Dahlgren	Austrolaenilla antarctica	Regan Drennan	1	unknown	adult	unknown	native	present	specimen stored in 80% non-denatured ethanol aqueous solution	in collection	Animalia	Annelida	Polychaeta		Polynoidae		Austrolaenilla	Austrolaenilla antarctica	Bergström, 1916	urn:lsid:marinespecies.org:taxname:155221	species	Preliminary identification, molecular identification to follow	46	JR17003a_9_46	2018-03-06	17:13:00	Agassiz Trawl	-63.806	-58.0652	WGS84	869.95	Antarctica | Southern Ocean	Antarctica	Southern Ocean	Prince Gustav Channel	11614	RRS James Clark Ross JR17003a |site PGC Mid 850 m | locationID based on SCAR Composite Gazetteer Of Antarctica	en	NHMUK	British Antarctic Survey expedition JR17003a	PreservedSpecimen	motile surface-dwelling omnivorous	medium
JR17003_NHM_234G	JR17003_NHM_234G	Adrian G Glover | Thomas G Dahlgren	Harmothoe fuligineum	Regan Drennan	11	unknown	adult	unknown	native	present	specimen stored in 80% non-denatured ethanol aqueous solution	in collection	Animalia	Annelida	Polychaeta		Polynoidae		Harmothoe	Harmothoe fuligineum	(Baird, 1865)	urn:lsid:marinespecies.org:taxname:445268	species	Preliminary identification, molecular identification to follow	46	JR17003a_9_46	2018-03-06	17:13:00	Agassiz Trawl	-63.806	-58.0652	WGS84	869.95	Antarctica | Southern Ocean	Antarctica	Southern Ocean	Prince Gustav Channel	11614	RRS James Clark Ross JR17003a |site PGC Mid 850 m | locationID based on SCAR Composite Gazetteer Of Antarctica	en	NHMUK	British Antarctic Survey expedition JR17003a	PreservedSpecimen	motile surface-dwelling omnivorous	medium
JR17003_NHM_234H	JR17003_NHM_234H	Adrian G Glover | Thomas G Dahlgren	Antarctinoe ferox	Regan Drennan	4	unknown	adult	unknown	native	present	specimen stored in 80% non-denatured ethanol aqueous solution	in collection	Animalia	Annelida	Polychaeta		Polynoidae		Antarctinoe	Antarctinoe ferox	(Baird, 1865)	urn:lsid:marinespecies.org:taxname:236689	species	Preliminary identification, molecular identification to follow	46	JR17003a_9_46	2018-03-06	17:13:00	Agassiz Trawl	-63.806	-58.0652	WGS84	869.95	Antarctica | Southern Ocean	Antarctica	Southern Ocean	Prince Gustav Channel	11614	RRS James Clark Ross JR17003a |site PGC Mid 850 m | locationID based on SCAR Composite Gazetteer Of Antarctica	en	NHMUK	British Antarctic Survey expedition JR17003a	PreservedSpecimen	motile surface-dwelling omnivorous	medium
JR17003_NHM_234I	JR17003_NHM_234I	Adrian G Glover | Thomas G Dahlgren	Antarctinoe cf. ferox NHM_232	Regan Drennan	14	unknown	adult	unknown	native	present	specimen stored in 80% non-denatured ethanol aqueous solution	in collection	Animalia	Annelida	Polychaeta		Polynoidae		Antarctinoe	Antarctinoe	Barnich, Fiege, Micaletto & Gambi, 2006	urn:lsid:marinespecies.org:taxname:236657	genus	Preliminary identification, molecular identification to follow | Antarctinoe cf. ferox sp. NHM_232	46	JR17003a_9_46	2018-03-06	17:13:00	Agassiz Trawl	-63.806	-58.0652	WGS84	869.95	Antarctica | Southern Ocean	Antarctica	Southern Ocean	Prince Gustav Channel	11614	RRS James Clark Ross JR17003a |site PGC Mid 850 m | locationID based on SCAR Composite Gazetteer Of Antarctica	en	NHMUK	British Antarctic Survey expedition JR17003a	PreservedSpecimen	motile surface-dwelling omnivorous	medium
JR17003_NHM_234J	JR17003_NHM_234J	Adrian G Glover | Thomas G Dahlgren	Polynoidae sp. NHM_228	Regan Drennan	1	unknown	adult	unknown	native	present	specimen stored in 80% non-denatured ethanol aqueous solution	in collection	Animalia	Annelida	Polychaeta		Polynoidae			Polynoidae	Kinberg, 1856	urn:lsid:marinespecies.org:taxname:939	family	Preliminary identification, molecular identification to follow | sp. NHM_228	46	JR17003a_9_46	2018-03-06	17:13:00	Agassiz Trawl	-63.806	-58.0652	WGS84	869.95	Antarctica | Southern Ocean	Antarctica	Southern Ocean	Prince Gustav Channel	11614	RRS James Clark Ross JR17003a |site PGC Mid 850 m | locationID based on SCAR Composite Gazetteer Of Antarctica	en	NHMUK	British Antarctic Survey expedition JR17003a	PreservedSpecimen	motile surface-dwelling omnivorous	medium
JR17003_NHM_234K	JR17003_NHM_234K	Adrian G Glover | Thomas G Dahlgren	Antarctinoe spicoides	Regan Drennan	1	unknown	adult	unknown	native	present	specimen stored in 80% non-denatured ethanol aqueous solution	in collection	Animalia	Annelida	Polychaeta		Polynoidae		Antarctinoe	Antarctinoe spicoides	(Hartmann-Schröder, 1986)	urn:lsid:marinespecies.org:taxname:236658	species	Preliminary identification, molecular identification to follow	46	JR17003a_9_46	2018-03-06	17:13:00	Agassiz Trawl	-63.806	-58.0652	WGS84	869.95	Antarctica | Southern Ocean	Antarctica	Southern Ocean	Prince Gustav Channel	11614	RRS James Clark Ross JR17003a |site PGC Mid 850 m | locationID based on SCAR Composite Gazetteer Of Antarctica	en	NHMUK	British Antarctic Survey expedition JR17003a	PreservedSpecimen	motile surface-dwelling omnivorous	large
JR17003_NHM_234L	JR17003_NHM_234L	Adrian G Glover | Thomas G Dahlgren	Macellicephalinae sp. NHM_234L	Regan Drennan	1	unknown	adult	unknown	native	present	specimen stored in 80% non-denatured ethanol aqueous solution	in collection	Animalia	Annelida	Polychaeta		Polynoidae	Macellicephalinae		Macellicephalinae	Hartmann-Schröder, 1971	urn:lsid:marinespecies.org:taxname:196343	subfamily	Preliminary identification, molecular identification to follow | sp. NHM_234L	46	JR17003a_9_46	2018-03-06	17:13:00	Agassiz Trawl	-63.806	-58.0652	WGS84	869.95	Antarctica | Southern Ocean	Antarctica	Southern Ocean	Prince Gustav Channel	11614	RRS James Clark Ross JR17003a |site PGC Mid 850 m | locationID based on SCAR Composite Gazetteer Of Antarctica	en	NHMUK	British Antarctic Survey expedition JR17003a	PreservedSpecimen	motile surface-dwelling omnivorous	large
JR17003_NHM_234M	JR17003_NHM_234M	Adrian G Glover | Thomas G Dahlgren	Barrukia cristata	Regan Drennan	4	unknown	adult	unknown	native	present	specimen stored in 80% non-denatured ethanol aqueous solution	in collection	Animalia	Annelida	Polychaeta		Polynoidae		Barrukia	Barrukia cristata	(Willey, 1902)	urn:lsid:marinespecies.org:taxname:174308	species	Preliminary identification, molecular identification to follow	46	JR17003a_9_46	2018-03-06	17:13:00	Agassiz Trawl	-63.806	-58.0652	WGS84	869.95	Antarctica | Southern Ocean	Antarctica	Southern Ocean	Prince Gustav Channel	11614	RRS James Clark Ross JR17003a |site PGC Mid 850 m | locationID based on SCAR Composite Gazetteer Of Antarctica	en	NHMUK	British Antarctic Survey expedition JR17003a	PreservedSpecimen	motile surface-dwelling omnivorous	medium
JR17003_NHM_234N	JR17003_NHM_234N	Adrian G Glover | Thomas G Dahlgren	Sabellidae sp. NHM_272	Regan Drennan	1	unknown	adult	unknown	native	present	specimen stored in 80% non-denatured ethanol aqueous solution	in collection	Animalia	Annelida	Polychaeta		Sabellidae			Sabellidae	Latreille, 1825	urn:lsid:marinespecies.org:taxname:985	family	Preliminary identification, molecular identification to follow | sp. NHM_272	46	JR17003a_9_46	2018-03-06	17:13:00	Agassiz Trawl	-63.806	-58.0652	WGS84	869.95	Antarctica | Southern Ocean	Antarctica	Southern Ocean	Prince Gustav Channel	11614	RRS James Clark Ross JR17003a |site PGC Mid 850 m | locationID based on SCAR Composite Gazetteer Of Antarctica	en	NHMUK	British Antarctic Survey expedition JR17003a	PreservedSpecimen	tube building suspension feeding	medium
JR17003_NHM_234O	JR17003_NHM_234O	Adrian G Glover | Thomas G Dahlgren	Pionosyllis kerguelensis	Regan Drennan	3	unknown	adult	unknown	native	present	specimen stored in 80% non-denatured ethanol aqueous solution	in collection	Animalia	Annelida	Polychaeta		Syllidae		Pionosyllis	Pionosyllis kerguelensis	(McIntosh, 1885)	urn:lsid:marinespecies.org:taxname:761615	species	Preliminary identification, molecular identification to follow	46	JR17003a_9_46	2018-03-06	17:13:00	Agassiz Trawl	-63.806	-58.0652	WGS84	869.95	Antarctica | Southern Ocean	Antarctica	Southern Ocean	Prince Gustav Channel	11614	RRS James Clark Ross JR17003a |site PGC Mid 850 m | locationID based on SCAR Composite Gazetteer Of Antarctica	en	NHMUK	British Antarctic Survey expedition JR17003a	PreservedSpecimen	motile surface-dwelling omnivorous	small
JR17003_NHM_234P	JR17003_NHM_234P	Adrian G Glover | Thomas G Dahlgren	Terebellidae sp. NHM_234P	Regan Drennan	2	unknown	adult	unknown	native	present	specimen stored in 80% non-denatured ethanol aqueous solution	in collection	Animalia	Annelida	Polychaeta		Terebellidae			Terebellidae	Johnston, 1846	urn:lsid:marinespecies.org:taxname:982	family	Preliminary identification, molecular identification to follow | sp. NHM_234P	46	JR17003a_9_46	2018-03-06	17:13:00	Agassiz Trawl	-63.806	-58.0652	WGS84	869.95	Antarctica | Southern Ocean	Antarctica	Southern Ocean	Prince Gustav Channel	11614	RRS James Clark Ross JR17003a |site PGC Mid 850 m | locationID based on SCAR Composite Gazetteer Of Antarctica	en	NHMUK	British Antarctic Survey expedition JR17003a	PreservedSpecimen	tube-building surface deposit feeding	medium
JR17003_NHM_235A	JR17003_NHM_235A	Adrian G Glover | Thomas G Dahlgren	Brada mammilata	Regan Drennan	1	unknown	adult	unknown	native	present	specimen stored in 80% non-denatured ethanol aqueous solution	in collection	Animalia	Annelida	Polychaeta		Flabelligeridae		Brada	Brada mammilata	Grube, 1877	urn:lsid:marinespecies.org:taxname:173298	species	Preliminary identification, molecular identification to follow	46	JR17003a_9_46	2018-03-06	17:13:00	Agassiz Trawl	-63.806	-58.0652	WGS84	869.95	Antarctica | Southern Ocean	Antarctica	Southern Ocean	Prince Gustav Channel	11614	RRS James Clark Ross JR17003a |site PGC Mid 850 m | locationID based on SCAR Composite Gazetteer Of Antarctica	en	NHMUK	British Antarctic Survey expedition JR17003a	PreservedSpecimen	motile surface deposit feeder	medium
JR17003_NHM_235B	JR17003_NHM_235B	Adrian G Glover | Thomas G Dahlgren	Flabegraviera mundata	Regan Drennan	4	unknown	adult	unknown	native	present	specimen stored in 80% non-denatured ethanol aqueous solution	in collection	Animalia	Annelida	Polychaeta		Flabelligeridae		Flabegraviera	Flabegraviera mundata	(Gravier, 1906)	urn:lsid:marinespecies.org:taxname:934969	species	Preliminary identification, molecular identification to follow	46	JR17003a_9_46	2018-03-06	17:13:00	Agassiz Trawl	-63.806	-58.0652	WGS84	869.95	Antarctica | Southern Ocean	Antarctica	Southern Ocean	Prince Gustav Channel	11614	RRS James Clark Ross JR17003a |site PGC Mid 850 m | locationID based on SCAR Composite Gazetteer Of Antarctica	en	NHMUK	British Antarctic Survey expedition JR17003a	PreservedSpecimen	motile surface deposit feeder	medium
JR17003_NHM_235C	JR17003_NHM_235C	Adrian G Glover | Thomas G Dahlgren	Oweniidae sp. NHM_234C	Regan Drennan	5	unknown	adult	unknown	native	present	specimen stored in 80% non-denatured ethanol aqueous solution	in collection	Animalia	Annelida	Polychaeta		Oweniidae			Oweniidae	Rioja, 1917	urn:lsid:marinespecies.org:taxname:975	family	Preliminary identification, molecular identification to follow | sp. NHM_234C	46	JR17003a_9_46	2018-03-06	17:13:00	Agassiz Trawl	-63.806	-58.0652	WGS84	869.95	Antarctica | Southern Ocean	Antarctica	Southern Ocean	Prince Gustav Channel	11614	RRS James Clark Ross JR17003a |site PGC Mid 850 m | locationID based on SCAR Composite Gazetteer Of Antarctica	en	NHMUK	British Antarctic Survey expedition JR17003a	PreservedSpecimen	tube-building surface deposit feeding	medium
JR17003_NHM_235D	JR17003_NHM_235D	Adrian G Glover | Thomas G Dahlgren	Phyllodocidae sp. NHM_235D	Regan Drennan	1	unknown	adult	unknown	native	present	specimen stored in 80% non-denatured ethanol aqueous solution	in collection	Animalia	Annelida	Polychaeta		Phyllodocidae			Phyllodocidae	Örsted, 1843	urn:lsid:marinespecies.org:taxname:931	family	Preliminary identification, molecular identification to follow | sp. NHM_235D	46	JR17003a_9_46	2018-03-06	17:13:00	Agassiz Trawl	-63.806	-58.0652	WGS84	869.95	Antarctica | Southern Ocean	Antarctica	Southern Ocean	Prince Gustav Channel	11614	RRS James Clark Ross JR17003a |site PGC Mid 850 m | locationID based on SCAR Composite Gazetteer Of Antarctica	en	NHMUK	British Antarctic Survey expedition JR17003a	PreservedSpecimen	motile surface-dwelling omnivorous	medium
JR17003_NHM_235E	JR17003_NHM_235E	Adrian G Glover | Thomas G Dahlgren	Harmothoe fuligineum	Regan Drennan	7	unknown	adult	unknown	native	present	specimen stored in 80% non-denatured ethanol aqueous solution	in collection	Animalia	Annelida	Polychaeta		Polynoidae		Harmothoe	Harmothoe fuligineum	(Baird, 1865)	urn:lsid:marinespecies.org:taxname:445268	species	Preliminary identification, molecular identification to follow	46	JR17003a_9_46	2018-03-06	17:13:00	Agassiz Trawl	-63.806	-58.0652	WGS84	869.95	Antarctica | Southern Ocean	Antarctica	Southern Ocean	Prince Gustav Channel	11614	RRS James Clark Ross JR17003a |site PGC Mid 850 m | locationID based on SCAR Composite Gazetteer Of Antarctica	en	NHMUK	British Antarctic Survey expedition JR17003a	PreservedSpecimen	motile surface-dwelling omnivorous	medium
JR17003_NHM_235F	JR17003_NHM_235F	Adrian G Glover | Thomas G Dahlgren	Antarctinoe ferox	Regan Drennan	3	unknown	adult	unknown	native	present	specimen stored in 80% non-denatured ethanol aqueous solution	in collection	Animalia	Annelida	Polychaeta		Polynoidae		Antarctinoe	Antarctinoe ferox	(Baird, 1865)	urn:lsid:marinespecies.org:taxname:236689	species	Preliminary identification, molecular identification to follow	46	JR17003a_9_46	2018-03-06	17:13:00	Agassiz Trawl	-63.806	-58.0652	WGS84	869.95	Antarctica | Southern Ocean	Antarctica	Southern Ocean	Prince Gustav Channel	11614	RRS James Clark Ross JR17003a |site PGC Mid 850 m | locationID based on SCAR Composite Gazetteer Of Antarctica	en	NHMUK	British Antarctic Survey expedition JR17003a	PreservedSpecimen	motile surface-dwelling omnivorous	medium
JR17003_NHM_235G	JR17003_NHM_235G	Adrian G Glover | Thomas G Dahlgren	Antarctinoe cf. ferox NHM_232	Regan Drennan	24	unknown	adult	unknown	native	present	specimen stored in 80% non-denatured ethanol aqueous solution	in collection	Animalia	Annelida	Polychaeta		Polynoidae		Antarctinoe	Antarctinoe	Barnich, Fiege, Micaletto & Gambi, 2006	urn:lsid:marinespecies.org:taxname:236657	genus	Preliminary identification, molecular identification to follow | Antarctinoe cf. ferox sp. NHM_232	46	JR17003a_9_46	2018-03-06	17:13:00	Agassiz Trawl	-63.806	-58.0652	WGS84	869.95	Antarctica | Southern Ocean	Antarctica	Southern Ocean	Prince Gustav Channel	11614	RRS James Clark Ross JR17003a |site PGC Mid 850 m | locationID based on SCAR Composite Gazetteer Of Antarctica	en	NHMUK	British Antarctic Survey expedition JR17003a	PreservedSpecimen	motile surface-dwelling omnivorous	medium
JR17003_NHM_235H	JR17003_NHM_235H	Adrian G Glover | Thomas G Dahlgren	Harmothoe cf. fuligineum NHM_233	Regan Drennan	1	unknown	adult	unknown	native	present	specimen stored in 80% non-denatured ethanol aqueous solution	in collection	Animalia	Annelida	Polychaeta		Polynoidae		Harmothoe	Harmothoe	Kinberg, 1856	urn:lsid:marinespecies.org:taxname:129491	genus	Preliminary identification, molecular identification to follow | Harmothoe cf. fuligineum sp. NHM_233	46	JR17003a_9_46	2018-03-06	17:13:00	Agassiz Trawl	-63.806	-58.0652	WGS84	869.95	Antarctica | Southern Ocean	Antarctica	Southern Ocean	Prince Gustav Channel	11614	RRS James Clark Ross JR17003a |site PGC Mid 850 m | locationID based on SCAR Composite Gazetteer Of Antarctica	en	NHMUK	British Antarctic Survey expedition JR17003a	PreservedSpecimen	motile surface-dwelling omnivorous	medium
JR17003_NHM_235I	JR17003_NHM_235I	Adrian G Glover | Thomas G Dahlgren	Barrukia cristata	Regan Drennan	5	unknown	adult	unknown	native	present	specimen stored in 80% non-denatured ethanol aqueous solution	in collection	Animalia	Annelida	Polychaeta		Polynoidae		Barrukia	Barrukia cristata	(Willey, 1902)	urn:lsid:marinespecies.org:taxname:174308	species	Preliminary identification, molecular identification to follow	46	JR17003a_9_46	2018-03-06	17:13:00	Agassiz Trawl	-63.806	-58.0652	WGS84	869.95	Antarctica | Southern Ocean	Antarctica	Southern Ocean	Prince Gustav Channel	11614	RRS James Clark Ross JR17003a |site PGC Mid 850 m | locationID based on SCAR Composite Gazetteer Of Antarctica	en	NHMUK	British Antarctic Survey expedition JR17003a	PreservedSpecimen	motile surface-dwelling omnivorous	medium
JR17003_NHM_235J	JR17003_NHM_235J	Adrian G Glover | Thomas G Dahlgren	Pionosyllis kerguelensis	Regan Drennan	3	unknown	adult	unknown	native	present	specimen stored in 80% non-denatured ethanol aqueous solution	in collection	Animalia	Annelida	Polychaeta		Syllidae		Pionosyllis	Pionosyllis kerguelensis	(McIntosh, 1885)	urn:lsid:marinespecies.org:taxname:761615	species	Preliminary identification, molecular identification to follow	46	JR17003a_9_46	2018-03-06	17:13:00	Agassiz Trawl	-63.806	-58.0652	WGS84	869.95	Antarctica | Southern Ocean	Antarctica	Southern Ocean	Prince Gustav Channel	11614	RRS James Clark Ross JR17003a |site PGC Mid 850 m | locationID based on SCAR Composite Gazetteer Of Antarctica	en	NHMUK	British Antarctic Survey expedition JR17003a	PreservedSpecimen	motile surface-dwelling omnivorous	small
JR17003_NHM_235K	JR17003_NHM_235K	Adrian G Glover | Thomas G Dahlgren	Trypanosyllis gigantea	Regan Drennan	1	unknown	adult	unknown	native	present	specimen stored in 80% non-denatured ethanol aqueous solution	in collection	Animalia	Annelida	Polychaeta		Syllidae		Trypanosyllis	Trypanosyllis gigantea	(McIntosh, 1885)	urn:lsid:marinespecies.org:taxname:131465	species	Preliminary identification, molecular identification to follow	46	JR17003a_9_46	2018-03-06	17:13:00	Agassiz Trawl	-63.806	-58.0652	WGS84	869.95	Antarctica | Southern Ocean	Antarctica	Southern Ocean	Prince Gustav Channel	11614	RRS James Clark Ross JR17003a |site PGC Mid 850 m | locationID based on SCAR Composite Gazetteer Of Antarctica	en	NHMUK	British Antarctic Survey expedition JR17003a	PreservedSpecimen	motile surface-dwelling omnivorous	medium
JR17003_NHM_267	JR17003_NHM_267	Adrian G Glover | Thomas G Dahlgren	Antarctinoe ferox	Regan Drennan	1	unknown	adult	unknown	native	present	specimen stored in 80% non-denatured ethanol aqueous solution	in collection	Animalia	Annelida	Polychaeta		Polynoidae		Antarctinoe	Antarctinoe ferox	(Baird, 1865)	urn:lsid:marinespecies.org:taxname:236689	species	Preliminary identification, molecular identification to follow	52	JR17003a_2_52	2018-03-07	17:33:00	Agassiz Trawl	-63.6161	-57.5035	WGS84	483.01	Antarctica | Southern Ocean	Antarctica	Southern Ocean	Duse Bay	3981	RRS James Clark Ross JR17003a |site Duse Bay 500 m | locationID based on SCAR Composite Gazetteer Of Antarctica	en	NHMUK	British Antarctic Survey expedition JR17003a	PreservedSpecimen	motile surface-dwelling omnivorous	large
JR17003_NHM_268	JR17003_NHM_268	Adrian G Glover | Thomas G Dahlgren	Trypanosyllis gigantea	Regan Drennan	1	unknown	adult	unknown	native	present	specimen stored in 80% non-denatured ethanol aqueous solution	in collection	Animalia	Annelida	Polychaeta		Syllidae		Trypanosyllis	Trypanosyllis gigantea	(McIntosh, 1885)	urn:lsid:marinespecies.org:taxname:131465	species	Preliminary identification, molecular identification to follow	52	JR17003a_2_52	2018-03-07	17:33:00	Agassiz Trawl	-63.6161	-57.5035	WGS84	483.01	Antarctica | Southern Ocean	Antarctica	Southern Ocean	Duse Bay	3981	RRS James Clark Ross JR17003a |site Duse Bay 500 m | locationID based on SCAR Composite Gazetteer Of Antarctica	en	NHMUK	British Antarctic Survey expedition JR17003a	PreservedSpecimen	motile surface-dwelling omnivorous	medium
JR17003_NHM_269	JR17003_NHM_269	Adrian G Glover | Thomas G Dahlgren	Trypanosyllis gigantea	Regan Drennan	1	unknown	adult	unknown	native	present	specimen stored in 80% non-denatured ethanol aqueous solution	in collection	Animalia	Annelida	Polychaeta		Syllidae		Trypanosyllis	Trypanosyllis gigantea	(McIntosh, 1885)	urn:lsid:marinespecies.org:taxname:131465	species	Preliminary identification, molecular identification to follow	52	JR17003a_2_52	2018-03-07	17:33:00	Agassiz Trawl	-63.6161	-57.5035	WGS84	483.01	Antarctica | Southern Ocean	Antarctica	Southern Ocean	Duse Bay	3981	RRS James Clark Ross JR17003a |site Duse Bay 500 m | locationID based on SCAR Composite Gazetteer Of Antarctica	en	NHMUK	British Antarctic Survey expedition JR17003a	PreservedSpecimen	motile surface-dwelling omnivorous	large
JR17003_NHM_270	JR17003_NHM_270	Adrian G Glover | Thomas G Dahlgren	Trypanosyllis gigantea	Regan Drennan	3	unknown	adult	unknown	native	present	specimen stored in 80% non-denatured ethanol aqueous solution	in collection	Animalia	Annelida	Polychaeta		Syllidae		Trypanosyllis	Trypanosyllis gigantea	(McIntosh, 1885)	urn:lsid:marinespecies.org:taxname:131465	species	Preliminary identification, molecular identification to follow	52	JR17003a_2_52	2018-03-07	17:33:00	Agassiz Trawl	-63.6161	-57.5035	WGS84	483.01	Antarctica | Southern Ocean	Antarctica	Southern Ocean	Duse Bay	3981	RRS James Clark Ross JR17003a |site Duse Bay 500 m | locationID based on SCAR Composite Gazetteer Of Antarctica	en	NHMUK	British Antarctic Survey expedition JR17003a	PreservedSpecimen	motile surface-dwelling omnivorous	*1 large/2 medium
JR17003_NHM_271	JR17003_NHM_271	Adrian G Glover | Thomas G Dahlgren	Leaena collaris	Regan Drennan	1	unknown	adult	unknown	native	present	specimen stored in 80% non-denatured ethanol aqueous solution	in collection	Animalia	Annelida	Polychaeta		Terebellidae		Leaena	Leaena collaris	Hessle, 1917	urn:lsid:marinespecies.org:taxname:174936	species	Preliminary identification, molecular identification to follow	52	JR17003a_2_52	2018-03-07	17:33:00	Agassiz Trawl	-63.6161	-57.5035	WGS84	483.01	Antarctica | Southern Ocean	Antarctica	Southern Ocean	Duse Bay	3981	RRS James Clark Ross JR17003a |site Duse Bay 500 m | locationID based on SCAR Composite Gazetteer Of Antarctica	en	NHMUK	British Antarctic Survey expedition JR17003a	PreservedSpecimen	tube-building surface deposit feeding	medium
JR17003_NHM_272	JR17003_NHM_272	Adrian G Glover | Thomas G Dahlgren	Sabellidae sp. NHM_272	Regan Drennan	1	unknown	adult	unknown	native	present	specimen stored in 80% non-denatured ethanol aqueous solution	in collection	Animalia	Annelida	Polychaeta		Sabellidae			Sabellidae	Latreille, 1825	urn:lsid:marinespecies.org:taxname:985	family	Preliminary identification, molecular identification to follow | sp. NHM_272	52	JR17003a_2_52	2018-03-07	17:33:00	Agassiz Trawl	-63.6161	-57.5035	WGS84	483.01	Antarctica | Southern Ocean	Antarctica	Southern Ocean	Duse Bay	3981	RRS James Clark Ross JR17003a |site Duse Bay 500 m | locationID based on SCAR Composite Gazetteer Of Antarctica	en	NHMUK	British Antarctic Survey expedition JR17003a	PreservedSpecimen	tube building suspension feeding	medium
JR17003_NHM_273	JR17003_NHM_273	Adrian G Glover | Thomas G Dahlgren	Chaetocirratulus andersenensis	Regan Drennan	1	unknown	adult	unknown	native	present	specimen stored in 80% non-denatured ethanol aqueous solution	in collection	Animalia	Annelida	Polychaeta		Cirratulidae		Chaetocirratulus	Chaetocirratulus andersenensis	(Augener, 1932)	urn:lsid:marinespecies.org:taxname:1316611	species	Preliminary identification, molecular identification to follow	52	JR17003a_2_52	2018-03-07	17:33:00	Agassiz Trawl	-63.6161	-57.5035	WGS84	483.01	Antarctica | Southern Ocean	Antarctica	Southern Ocean	Duse Bay	3981	RRS James Clark Ross JR17003a |site Duse Bay 500 m | locationID based on SCAR Composite Gazetteer Of Antarctica	en	NHMUK	British Antarctic Survey expedition JR17003a	PreservedSpecimen	burrowing	small
JR17003_NHM_274	JR17003_NHM_274	Adrian G Glover | Thomas G Dahlgren	Maldane sarsi	Regan Drennan	1	unknown	adult	unknown	native	present	specimen stored in 80% non-denatured ethanol aqueous solution	in collection	Animalia	Annelida	Polychaeta		Maldanidae		Maldane	Maldane sarsi	Malmgren, 1865	urn:lsid:marinespecies.org:taxname:130305	species	Preliminary identification, molecular identification to follow	52	JR17003a_2_52	2018-03-07	17:33:00	Agassiz Trawl	-63.6161	-57.5035	WGS84	483.01	Antarctica | Southern Ocean	Antarctica	Southern Ocean	Duse Bay	3981	RRS James Clark Ross JR17003a |site Duse Bay 500 m | locationID based on SCAR Composite Gazetteer Of Antarctica	en	NHMUK	British Antarctic Survey expedition JR17003a	PreservedSpecimen	burrowing	medium
JR17003_NHM_275	JR17003_NHM_275	Adrian G Glover | Thomas G Dahlgren	Maldane sarsi	Regan Drennan	1	unknown	adult	unknown	native	present	specimen stored in 80% non-denatured ethanol aqueous solution	in collection	Animalia	Annelida	Polychaeta		Maldanidae		Maldane	Maldane sarsi	Malmgren, 1865	urn:lsid:marinespecies.org:taxname:130305	species	Preliminary identification, molecular identification to follow	52	JR17003a_2_52	2018-03-07	17:33:00	Agassiz Trawl	-63.6161	-57.5035	WGS84	483.01	Antarctica | Southern Ocean	Antarctica	Southern Ocean	Duse Bay	3981	RRS James Clark Ross JR17003a |site Duse Bay 500 m | locationID based on SCAR Composite Gazetteer Of Antarctica	en	NHMUK	British Antarctic Survey expedition JR17003a	PreservedSpecimen	burrowing	medium
JR17003_NHM_277	JR17003_NHM_277	Adrian G Glover | Thomas G Dahlgren	Pista mirabilis	Regan Drennan	1	unknown	adult	unknown	native	present	specimen stored in 80% non-denatured ethanol aqueous solution	in collection	Animalia	Annelida	Polychaeta		Terebellidae		Pista	Pista mirabilis	McIntosh, 1885	urn:lsid:marinespecies.org:taxname:131520	species	Preliminary identification, molecular identification to follow	52	JR17003a_2_52	2018-03-07	17:33:00	Agassiz Trawl	-63.6161	-57.5035	WGS84	483.01	Antarctica | Southern Ocean	Antarctica	Southern Ocean	Duse Bay	3981	RRS James Clark Ross JR17003a |site Duse Bay 500 m | locationID based on SCAR Composite Gazetteer Of Antarctica	en	NHMUK	British Antarctic Survey expedition JR17003a	PreservedSpecimen	tube-building surface deposit feeding	large
JR17003_NHM_278	JR17003_NHM_278	Adrian G Glover | Thomas G Dahlgren	Aglaophamus trissophyllus	Regan Drennan	1	unknown	adult	unknown	native	present	specimen stored in 80% non-denatured ethanol aqueous solution	in collection	Animalia	Annelida	Polychaeta		Nephtyidae		Aglaophamus	Aglaophamus trissophyllus	(Grube, 1877)	urn:lsid:marinespecies.org:taxname:173693	species	Preliminary identification, molecular identification to follow	52	JR17003a_2_52	2018-03-07	17:33:00	Agassiz Trawl	-63.6161	-57.5035	WGS84	483.01	Antarctica | Southern Ocean	Antarctica	Southern Ocean	Duse Bay	3981	RRS James Clark Ross JR17003a |site Duse Bay 500 m | locationID based on SCAR Composite Gazetteer Of Antarctica	en	NHMUK	British Antarctic Survey expedition JR17003a	PreservedSpecimen	motile surface-dwelling omnivorous	large
JR17003_NHM_279	JR17003_NHM_279	Adrian G Glover | Thomas G Dahlgren	Trypanosyllis gigantea	Regan Drennan	1	unknown	adult	unknown	native	present	specimen stored in 80% non-denatured ethanol aqueous solution	in collection	Animalia	Annelida	Polychaeta		Syllidae		Trypanosyllis	Trypanosyllis gigantea	(McIntosh, 1885)	urn:lsid:marinespecies.org:taxname:131465	species	Preliminary identification, molecular identification to follow	52	JR17003a_2_52	2018-03-07	17:33:00	Agassiz Trawl	-63.6161	-57.5035	WGS84	483.01	Antarctica | Southern Ocean	Antarctica	Southern Ocean	Duse Bay	3981	RRS James Clark Ross JR17003a |site Duse Bay 500 m | locationID based on SCAR Composite Gazetteer Of Antarctica	en	NHMUK	British Antarctic Survey expedition JR17003a	PreservedSpecimen	motile surface-dwelling omnivorous	large
JR17003_NHM_280A	JR17003_NHM_280A	Adrian G Glover | Thomas G Dahlgren	Ampharetidae sp. NHM_280A	Regan Drennan	2	unknown	adult	unknown	native	present	specimen stored in 80% non-denatured ethanol aqueous solution	in collection	Animalia	Annelida	Polychaeta		Ampharetidae			Ampharetidae	Malmgren, 1866	urn:lsid:marinespecies.org:taxname:981	family	Preliminary identification, molecular identification to follow | sp. NHM_280A	52	JR17003a_2_52	2018-03-07	17:33:00	Agassiz Trawl	-63.6161	-57.5035	WGS84	483.01	Antarctica | Southern Ocean	Antarctica	Southern Ocean	Duse Bay	3981	RRS James Clark Ross JR17003a |site Duse Bay 500 m | locationID based on SCAR Composite Gazetteer Of Antarctica	en	NHMUK	British Antarctic Survey expedition JR17003a	PreservedSpecimen	tube-building surface deposit feeding	medium
JR17003_NHM_280B	JR17003_NHM_280B	Adrian G Glover | Thomas G Dahlgren	Augeneria tentaculata	Regan Drennan	4	unknown	adult	unknown	native	present	specimen stored in 80% non-denatured ethanol aqueous solution	in collection	Animalia	Annelida	Polychaeta		Lumbrineridae		Augeneria	Augeneria tentaculata	Monro, 1930	urn:lsid:marinespecies.org:taxname:130225	species	Preliminary identification, molecular identification to follow	52	JR17003a_2_52	2018-03-07	17:33:00	Agassiz Trawl	-63.6161	-57.5035	WGS84	483.01	Antarctica | Southern Ocean	Antarctica	Southern Ocean	Duse Bay	3981	RRS James Clark Ross JR17003a |site Duse Bay 500 m | locationID based on SCAR Composite Gazetteer Of Antarctica	en	NHMUK	British Antarctic Survey expedition JR17003a	PreservedSpecimen	burrowing	medium
JR17003_NHM_280C	JR17003_NHM_280C	Adrian G Glover | Thomas G Dahlgren	Maldane sarsi	Regan Drennan	31	unknown	adult	unknown	native	present	specimen stored in 80% non-denatured ethanol aqueous solution	in collection	Animalia	Annelida	Polychaeta		Maldanidae		Maldane	Maldane sarsi	Malmgren, 1865	urn:lsid:marinespecies.org:taxname:130305	species	Preliminary identification, molecular identification to follow	52	JR17003a_2_52	2018-03-07	17:33:00	Agassiz Trawl	-63.6161	-57.5035	WGS84	483.01	Antarctica | Southern Ocean	Antarctica	Southern Ocean	Duse Bay	3981	RRS James Clark Ross JR17003a |site Duse Bay 500 m | locationID based on SCAR Composite Gazetteer Of Antarctica	en	NHMUK	British Antarctic Survey expedition JR17003a	PreservedSpecimen	burrowing	medium
JR17003_NHM_280D	JR17003_NHM_280D	Adrian G Glover | Thomas G Dahlgren	Lumbriclymenella robusta	Regan Drennan	1	unknown	adult	unknown	native	present	specimen stored in 80% non-denatured ethanol aqueous solution	in collection	Animalia	Annelida	Polychaeta		Maldanidae		Lumbriclymenella	Lumbriclymenella robusta	Arwidsson, 1911	urn:lsid:marinespecies.org:taxname:173613	species	Preliminary identification, molecular identification to follow	52	JR17003a_2_52	2018-03-07	17:33:00	Agassiz Trawl	-63.6161	-57.5035	WGS84	483.01	Antarctica | Southern Ocean	Antarctica	Southern Ocean	Duse Bay	3981	RRS James Clark Ross JR17003a |site Duse Bay 500 m | locationID based on SCAR Composite Gazetteer Of Antarctica	en	NHMUK	British Antarctic Survey expedition JR17003a	PreservedSpecimen	burrowing	medium
JR17003_NHM_280E	JR17003_NHM_280E	Adrian G Glover | Thomas G Dahlgren	Aglaophamus trissophyllus	Regan Drennan	2	unknown	adult	unknown	native	present	specimen stored in 80% non-denatured ethanol aqueous solution	in collection	Animalia	Annelida	Polychaeta		Nephtyidae		Aglaophamus	Aglaophamus trissophyllus	(Grube, 1877)	urn:lsid:marinespecies.org:taxname:173693	species	Preliminary identification, molecular identification to follow	52	JR17003a_2_52	2018-03-07	17:33:00	Agassiz Trawl	-63.6161	-57.5035	WGS84	483.01	Antarctica | Southern Ocean	Antarctica	Southern Ocean	Duse Bay	3981	RRS James Clark Ross JR17003a |site Duse Bay 500 m | locationID based on SCAR Composite Gazetteer Of Antarctica	en	NHMUK	British Antarctic Survey expedition JR17003a	PreservedSpecimen	motile surface-dwelling omnivorous	large
JR17003_NHM_280F	JR17003_NHM_280F	Adrian G Glover | Thomas G Dahlgren	Aglaophamus sp. NHM_280F	Regan Drennan	1	unknown	adult	unknown	native	present	specimen stored in 80% non-denatured ethanol aqueous solution	in collection	Animalia	Annelida	Polychaeta		Nephtyidae		Aglaophamus	Aglaophamus	Kinberg, 1866	urn:lsid:marinespecies.org:taxname:129366	genus	Preliminary identification, molecular identification to follow | sp. NHM_280F	52	JR17003a_2_52	2018-03-07	17:33:00	Agassiz Trawl	-63.6161	-57.5035	WGS84	483.01	Antarctica | Southern Ocean	Antarctica	Southern Ocean	Duse Bay	3981	RRS James Clark Ross JR17003a |site Duse Bay 500 m | locationID based on SCAR Composite Gazetteer Of Antarctica	en	NHMUK	British Antarctic Survey expedition JR17003a	PreservedSpecimen	motile surface-dwelling omnivorous	small
JR17003_NHM_280G	JR17003_NHM_280G	Adrian G Glover | Thomas G Dahlgren	Oweniidae sp. NHM_234C	Regan Drennan	1	unknown	adult	unknown	native	present	specimen stored in 80% non-denatured ethanol aqueous solution	in collection	Animalia	Annelida	Polychaeta		Oweniidae			Oweniidae	Rioja, 1917	urn:lsid:marinespecies.org:taxname:975	family	Preliminary identification, molecular identification to follow | sp. NHM_234C	52	JR17003a_2_52	2018-03-07	17:33:00	Agassiz Trawl	-63.6161	-57.5035	WGS84	483.01	Antarctica | Southern Ocean	Antarctica	Southern Ocean	Duse Bay	3981	RRS James Clark Ross JR17003a |site Duse Bay 500 m | locationID based on SCAR Composite Gazetteer Of Antarctica	en	NHMUK	British Antarctic Survey expedition JR17003a	PreservedSpecimen	tube-building surface deposit feeding	medium
JR17003_NHM_280H	JR17003_NHM_280H	Adrian G Glover | Thomas G Dahlgren	Austrolaenilla antarctica	Regan Drennan	1	unknown	adult	unknown	native	present	specimen stored in 80% non-denatured ethanol aqueous solution	in collection	Animalia	Annelida	Polychaeta		Polynoidae		Austrolaenilla	Austrolaenilla antarctica	Bergström, 1916	urn:lsid:marinespecies.org:taxname:155221	species	Preliminary identification, molecular identification to follow	52	JR17003a_2_52	2018-03-07	17:33:00	Agassiz Trawl	-63.6161	-57.5035	WGS84	483.01	Antarctica | Southern Ocean	Antarctica	Southern Ocean	Duse Bay	3981	RRS James Clark Ross JR17003a |site Duse Bay 500 m | locationID based on SCAR Composite Gazetteer Of Antarctica	en	NHMUK	British Antarctic Survey expedition JR17003a	PreservedSpecimen	motile surface-dwelling omnivorous	medium
JR17003_NHM_280I	JR17003_NHM_280I	Adrian G Glover | Thomas G Dahlgren	Harmothoe cf. fuligineum NHM_233	Regan Drennan	1	unknown	adult	unknown	native	present	specimen stored in 80% non-denatured ethanol aqueous solution	in collection	Animalia	Annelida	Polychaeta		Polynoidae		Harmothoe	Polynoidae	Kinberg, 1856	urn:lsid:marinespecies.org:taxname:129491	genus	Preliminary identification, molecular identification to follow | Harmothoe cf. fuligineum sp. NHM_233	52	JR17003a_2_52	2018-03-07	17:33:00	Agassiz Trawl	-63.6161	-57.5035	WGS84	483.01	Antarctica | Southern Ocean	Antarctica	Southern Ocean	Duse Bay	3981	RRS James Clark Ross JR17003a |site Duse Bay 500 m | locationID based on SCAR Composite Gazetteer Of Antarctica	en	NHMUK	British Antarctic Survey expedition JR17003a	PreservedSpecimen	motile surface-dwelling omnivorous	medium
JR17003_NHM_280J	JR17003_NHM_280J	Adrian G Glover | Thomas G Dahlgren	Sabellidae sp. NHM_272	Regan Drennan	1	unknown	adult	unknown	native	present	specimen stored in 80% non-denatured ethanol aqueous solution	in collection	Animalia	Annelida	Polychaeta		Sabellidae			Sabellidae	Latreille, 1825	urn:lsid:marinespecies.org:taxname:985	family	Preliminary identification, molecular identification to follow | sp. NHM_272	52	JR17003a_2_52	2018-03-07	17:33:00	Agassiz Trawl	-63.6161	-57.5035	WGS84	483.01	Antarctica | Southern Ocean	Antarctica	Southern Ocean	Duse Bay	3981	RRS James Clark Ross JR17003a |site Duse Bay 500 m | locationID based on SCAR Composite Gazetteer Of Antarctica	en	NHMUK	British Antarctic Survey expedition JR17003a	PreservedSpecimen	tube building suspension feeding	medium
JR17003_NHM_280K	JR17003_NHM_280K	Adrian G Glover | Thomas G Dahlgren	Serpulidae sp. NHM_280K	Regan Drennan	1	unknown	adult	unknown	native	present	specimen stored in 80% non-denatured ethanol aqueous solution	in collection	Animalia	Annelida	Polychaeta		Serpulidae			Serpulidae	Rafinesque, 1815	urn:lsid:marinespecies.org:taxname:988	family	Preliminary identification, molecular identification to follow | sp. NHM_280K	52	JR17003a_2_52	2018-03-07	17:33:00	Agassiz Trawl	-63.6161	-57.5035	WGS84	483.01	Antarctica | Southern Ocean	Antarctica	Southern Ocean	Duse Bay	3981	RRS James Clark Ross JR17003a |site Duse Bay 500 m | locationID based on SCAR Composite Gazetteer Of Antarctica	en	NHMUK	British Antarctic Survey expedition JR17003a	PreservedSpecimen	tube building suspension feeding	medium
JR17003_NHM_280M	JR17003_NHM_280M	Adrian G Glover | Thomas G Dahlgren	Trichobranchidae sp. NHM_280M	Regan Drennan	7	unknown	adult	unknown	native	present	specimen stored in 80% non-denatured ethanol aqueous solution	in collection	Animalia	Annelida	Polychaeta		Trichobranchidae			Trichobranchidae	Malmgren, 1866	urn:lsid:marinespecies.org:taxname:983	family	Preliminary identification, molecular identification to follow | sp. NHM_280M	52	JR17003a_2_52	2018-03-07	17:33:00	Agassiz Trawl	-63.6161	-57.5035	WGS84	483.01	Antarctica | Southern Ocean	Antarctica	Southern Ocean	Duse Bay	3981	RRS James Clark Ross JR17003a |site Duse Bay 500 m | locationID based on SCAR Composite Gazetteer Of Antarctica	en	NHMUK	British Antarctic Survey expedition JR17003a	PreservedSpecimen	tube-building surface deposit feeding	medium
JR17003_NHM_281	JR17003_NHM_281	Adrian G Glover | Thomas G Dahlgren	Scalibregmatidae sp. NHM_281	Regan Drennan	1	unknown	adult	unknown	native	present	specimen stored in 80% non-denatured ethanol aqueous solution	in collection	Animalia	Annelida	Polychaeta		Scalibregmatidae			Scalibregmatidae	Malmgren, 1867	urn:lsid:marinespecies.org:taxname:925	family	Preliminary identification, molecular identification to follow | sp. NHM_281	52	JR17003a_2_52	2018-03-07	17:33:00	Agassiz Trawl	-63.6161	-57.5035	WGS84	483.01	Antarctica | Southern Ocean	Antarctica	Southern Ocean	Duse Bay	3981	RRS James Clark Ross JR17003a |site Duse Bay 500 m | locationID based on SCAR Composite Gazetteer Of Antarctica	en	NHMUK	British Antarctic Survey expedition JR17003a	PreservedSpecimen	burrowing	small
JR17003_NHM_283	JR17003_NHM_283	Adrian G Glover | Thomas G Dahlgren	Cirratulidae sp. NHM_035	Regan Drennan	1	unknown	adult	unknown	native	present	specimen stored in 80% non-denatured ethanol aqueous solution	in collection	Animalia	Annelida	Polychaeta		Cirratulidae			Cirratulidae	Ryckholt, 1851	urn:lsid:marinespecies.org:taxname:919	family	Preliminary identification, molecular identification to follow | sp. NHM_035	52	JR17003a_2_52	2018-03-07	17:33:00	Agassiz Trawl	-63.6161	-57.5035	WGS84	483.01	Antarctica | Southern Ocean	Antarctica	Southern Ocean	Duse Bay	3981	RRS James Clark Ross JR17003a |site Duse Bay 500 m | locationID based on SCAR Composite Gazetteer Of Antarctica	en	NHMUK	British Antarctic Survey expedition JR17003a	PreservedSpecimen	burrowing	small
JR17003_NHM_284	JR17003_NHM_284	Adrian G Glover | Thomas G Dahlgren	Ophelina cf. cylindricaudata NHM_284	Regan Drennan	1	unknown	adult	unknown	native	present	specimen stored in 80% non-denatured ethanol aqueous solution	in collection	Animalia	Annelida	Polychaeta		Opheliidae		Ophelina	Ophelina	Örsted, 1843	urn:lsid:marinespecies.org:taxname:129414	genus	Preliminary identification, molecular identification to follow | Ophelina cf. cylindricaudata sp. NHM_284	52	JR17003a_2_52	2018-03-07	17:33:00	Agassiz Trawl	-63.6161	-57.5035	WGS84	483.01	Antarctica | Southern Ocean	Antarctica	Southern Ocean	Duse Bay	3981	RRS James Clark Ross JR17003a |site Duse Bay 500 m | locationID based on SCAR Composite Gazetteer Of Antarctica	en	NHMUK	British Antarctic Survey expedition JR17003a	PreservedSpecimen	burrowing	small
JR17003_NHM_285	JR17003_NHM_285	Adrian G Glover | Thomas G Dahlgren	Syllidae sp. NHM_285	Regan Drennan	1	unknown	adult	unknown	native	present	specimen stored in 80% non-denatured ethanol aqueous solution	in collection	Animalia	Annelida	Polychaeta		Syllidae			Syllidae	Grube, 1850	urn:lsid:marinespecies.org:taxname:948	family	Preliminary identification, molecular identification to follow | sp. NHM_285	52	JR17003a_2_52	2018-03-07	17:33:00	Agassiz Trawl	-63.6161	-57.5035	WGS84	483.01	Antarctica | Southern Ocean	Antarctica	Southern Ocean	Duse Bay	3981	RRS James Clark Ross JR17003a |site Duse Bay 500 m | locationID based on SCAR Composite Gazetteer Of Antarctica	en	NHMUK	British Antarctic Survey expedition JR17003a	PreservedSpecimen	motile surface-dwelling omnivorous	small
JR17003_NHM_286	JR17003_NHM_286	Adrian G Glover | Thomas G Dahlgren	Ophelina cf. cylindricaudata NHM_284	Regan Drennan	1	unknown	adult	unknown	native	present	specimen stored in 80% non-denatured ethanol aqueous solution	in collection	Animalia	Annelida	Polychaeta		Opheliidae		Ophelina	Ophelina	Örsted, 1843	urn:lsid:marinespecies.org:taxname:129414	genus	Preliminary identification, molecular identification to follow | Ophelina cf. cylindricaudata sp. NHM_284	52	JR17003a_2_52	2018-03-07	17:33:00	Agassiz Trawl	-63.6161	-57.5035	WGS84	483.01	Antarctica | Southern Ocean	Antarctica	Southern Ocean	Duse Bay	3981	RRS James Clark Ross JR17003a |site Duse Bay 500 m | locationID based on SCAR Composite Gazetteer Of Antarctica	en	NHMUK	British Antarctic Survey expedition JR17003a	PreservedSpecimen	burrowing	small
JR17003_NHM_287	JR17003_NHM_287	Adrian G Glover | Thomas G Dahlgren	Oligochaeta sp. NHM_287	Regan Drennan	1	unknown	adult	unknown	native	present	specimen stored in 80% non-denatured ethanol aqueous solution	in collection	Animalia	Annelida	Clitellata	Oligochaeta				Oligochaeta	Grube, 1850	urn:lsid:marinespecies.org:taxname:2036	subclass	Preliminary identification, molecular identification to follow | sp. NHM_287	52	JR17003a_2_52	2018-03-07	17:33:00	Agassiz Trawl	-63.6161	-57.5035	WGS84	483.01	Antarctica | Southern Ocean	Antarctica	Southern Ocean	Duse Bay	3981	RRS James Clark Ross JR17003a |site Duse Bay 500 m | locationID based on SCAR Composite Gazetteer Of Antarctica	en	NHMUK	British Antarctic Survey expedition JR17003a	PreservedSpecimen	burrowing	small
JR17003_NHM_288	JR17003_NHM_288	Adrian G Glover | Thomas G Dahlgren	Ophelina breviata	Regan Drennan	1	unknown	adult	unknown	native	present	specimen stored in 80% non-denatured ethanol aqueous solution	in collection	Animalia	Annelida	Polychaeta		Opheliidae		Ophelina	Ophelina breviata	(Ehlers, 1913)	urn:lsid:marinespecies.org:taxname:130502	species	Preliminary identification, molecular identification to follow	52	JR17003a_2_52	2018-03-07	17:33:00	Agassiz Trawl	-63.6161	-57.5035	WGS84	483.01	Antarctica | Southern Ocean	Antarctica	Southern Ocean	Duse Bay	3981	RRS James Clark Ross JR17003a |site Duse Bay 500 m | locationID based on SCAR Composite Gazetteer Of Antarctica	en	NHMUK	British Antarctic Survey expedition JR17003a	PreservedSpecimen	burrowing	small
JR17003_NHM_289	JR17003_NHM_289	Adrian G Glover | Thomas G Dahlgren	Oligochaeta sp. NHM_289	Regan Drennan	1	unknown	adult	unknown	native	present	specimen stored in 80% non-denatured ethanol aqueous solution	in collection	Animalia	Annelida	Clitellata	Oligochaeta				Oligochaeta	Grube, 1850	urn:lsid:marinespecies.org:taxname:2036	subclass	Preliminary identification, molecular identification to follow | sp. NHM_289	52	JR17003a_2_52	2018-03-07	17:33:00	Agassiz Trawl	-63.6161	-57.5035	WGS84	483.01	Antarctica | Southern Ocean	Antarctica	Southern Ocean	Duse Bay	3981	RRS James Clark Ross JR17003a |site Duse Bay 500 m | locationID based on SCAR Composite Gazetteer Of Antarctica	en	NHMUK	British Antarctic Survey expedition JR17003a	PreservedSpecimen	burrowing	small
JR17003_NHM_290	JR17003_NHM_290	Adrian G Glover | Thomas G Dahlgren	Protodorvillea sp. NHM_290	Regan Drennan	1	unknown	adult	unknown	native	present	specimen stored in 80% non-denatured ethanol aqueous solution	in collection	Animalia	Annelida	Polychaeta		Dorvilleidae		Protodorvillea	Protodorvillea	Pettibone, 1961	urn:lsid:marinespecies.org:taxname:129272	genus	Preliminary identification, molecular identification to follow | sp. NHM_290	52	JR17003a_2_52	2018-03-07	17:33:00	Agassiz Trawl	-63.6161	-57.5035	WGS84	483.01	Antarctica | Southern Ocean	Antarctica	Southern Ocean	Duse Bay	3981	RRS James Clark Ross JR17003a |site Duse Bay 500 m | locationID based on SCAR Composite Gazetteer Of Antarctica	en	NHMUK	British Antarctic Survey expedition JR17003a	PreservedSpecimen	motile surface-dwelling omnivorous	small
JR17003_NHM_291	JR17003_NHM_291	Adrian G Glover | Thomas G Dahlgren	Hesionidae sp. NHM_291	Regan Drennan	1	unknown	adult	unknown	native	present	specimen stored in 80% non-denatured ethanol aqueous solution	in collection	Animalia	Annelida	Polychaeta		Hesionidae			Hesionidae	Grube, 1850	urn:lsid:marinespecies.org:taxname:946	family	Preliminary identification, molecular identification to follow | sp. NHM_291	52	JR17003a_2_52	2018-03-07	17:33:00	Agassiz Trawl	-63.6161	-57.5035	WGS84	483.01	Antarctica | Southern Ocean	Antarctica	Southern Ocean	Duse Bay	3981	RRS James Clark Ross JR17003a |site Duse Bay 500 m | locationID based on SCAR Composite Gazetteer Of Antarctica	en	NHMUK	British Antarctic Survey expedition JR17003a	PreservedSpecimen	motile surface-dwelling omnivorous	small
JR17003_NHM_292	JR17003_NHM_292	Adrian G Glover | Thomas G Dahlgren	Protodorvillea sp. NHM_290	Regan Drennan	1	unknown	adult	unknown	native	present	specimen stored in 80% non-denatured ethanol aqueous solution	in collection	Animalia	Annelida	Polychaeta		Dorvilleidae		Protodorvillea	Protodorvillea	Pettibone, 1961	urn:lsid:marinespecies.org:taxname:129272	genus	Preliminary identification, molecular identification to follow | sp. NHM_290	52	JR17003a_2_52	2018-03-07	17:33:00	Agassiz Trawl	-63.6161	-57.5035	WGS84	483.01	Antarctica | Southern Ocean	Antarctica	Southern Ocean	Duse Bay	3981	RRS James Clark Ross JR17003a |site Duse Bay 500 m | locationID based on SCAR Composite Gazetteer Of Antarctica	en	NHMUK	British Antarctic Survey expedition JR17003a	PreservedSpecimen	motile surface-dwelling omnivorous	small
JR17003_NHM_294	JR17003_NHM_294	Adrian G Glover | Thomas G Dahlgren	Cirratulidae sp. NHM_035	Regan Drennan	1	unknown	adult	unknown	native	present	specimen stored in 80% non-denatured ethanol aqueous solution	in collection	Animalia	Annelida	Polychaeta		Cirratulidae			Cirratulidae	Ryckholt, 1851	urn:lsid:marinespecies.org:taxname:919	family	Preliminary identification, molecular identification to follow | sp. NHM_035	52	JR17003a_2_52	2018-03-07	17:33:00	Agassiz Trawl	-63.6161	-57.5035	WGS84	483.01	Antarctica | Southern Ocean	Antarctica	Southern Ocean	Duse Bay	3981	RRS James Clark Ross JR17003a |site Duse Bay 500 m | locationID based on SCAR Composite Gazetteer Of Antarctica	en	NHMUK	British Antarctic Survey expedition JR17003a	PreservedSpecimen	burrowing	small
JR17003_NHM_295	JR17003_NHM_295	Adrian G Glover | Thomas G Dahlgren	Paraonidae sp. NHM_295	Regan Drennan	1	unknown	adult	unknown	native	present	specimen stored in 80% non-denatured ethanol aqueous solution	in collection	Animalia	Annelida	Polychaeta		Paraonidae			Paraonidae	Cerruti, 1909	urn:lsid:marinespecies.org:taxname:903	family	Preliminary identification, molecular identification to follow | sp. NHM_295	52	JR17003a_2_52	2018-03-07	17:33:00	Agassiz Trawl	-63.6161	-57.5035	WGS84	483.01	Antarctica | Southern Ocean	Antarctica	Southern Ocean	Duse Bay	3981	RRS James Clark Ross JR17003a |site Duse Bay 500 m | locationID based on SCAR Composite Gazetteer Of Antarctica	en	NHMUK	British Antarctic Survey expedition JR17003a	PreservedSpecimen	burrowing	small
JR17003_NHM_296	JR17003_NHM_296	Adrian G Glover | Thomas G Dahlgren	Oligochaeta sp. NHM_287	Regan Drennan	1	unknown	adult	unknown	native	present	specimen stored in 80% non-denatured ethanol aqueous solution	in collection	Animalia	Annelida	Clitellata	Oligochaeta				Oligochaeta	Grube, 1850	urn:lsid:marinespecies.org:taxname:2036	subclass	Preliminary identification, molecular identification to follow | sp. NHM_287	52	JR17003a_2_52	2018-03-07	17:33:00	Agassiz Trawl	-63.6161	-57.5035	WGS84	483.01	Antarctica | Southern Ocean	Antarctica	Southern Ocean	Duse Bay	3981	RRS James Clark Ross JR17003a |site Duse Bay 500 m | locationID based on SCAR Composite Gazetteer Of Antarctica	en	NHMUK	British Antarctic Survey expedition JR17003a	PreservedSpecimen	burrowing	small
JR17003_NHM_297	JR17003_NHM_297	Adrian G Glover | Thomas G Dahlgren	Aphelochaeta sp. NHM_301	Regan Drennan	1	unknown	adult	unknown	native	present	specimen stored in 80% non-denatured ethanol aqueous solution	in collection	Animalia	Annelida	Polychaeta		Cirratulidae		Aphelochaeta	Aphelochaeta	Blake, 1991	urn:lsid:marinespecies.org:taxname:129240	genus	Preliminary identification, molecular identification to follow | sp. NHM_301	52	JR17003a_2_52	2018-03-07	17:33:00	Agassiz Trawl	-63.6161	-57.5035	WGS84	483.01	Antarctica | Southern Ocean	Antarctica	Southern Ocean	Duse Bay	3981	RRS James Clark Ross JR17003a |site Duse Bay 500 m | locationID based on SCAR Composite Gazetteer Of Antarctica	en	NHMUK	British Antarctic Survey expedition JR17003a	PreservedSpecimen	burrowing	small
JR17003_NHM_298	JR17003_NHM_298	Adrian G Glover | Thomas G Dahlgren	Ophelina cf. cylindricaudata NHM_284	Regan Drennan	1	unknown	adult	unknown	native	present	specimen stored in 80% non-denatured ethanol aqueous solution	in collection	Animalia	Annelida	Polychaeta		Opheliidae		Ophelina	Ophelina	Örsted, 1843	urn:lsid:marinespecies.org:taxname:129414	genus	Preliminary identification, molecular identification to follow | Ophelina cf. cylindricaudata sp. NHM_284	52	JR17003a_2_52	2018-03-07	17:33:00	Agassiz Trawl	-63.6161	-57.5035	WGS84	483.01	Antarctica | Southern Ocean	Antarctica	Southern Ocean	Duse Bay	3981	RRS James Clark Ross JR17003a |site Duse Bay 500 m | locationID based on SCAR Composite Gazetteer Of Antarctica	en	NHMUK	British Antarctic Survey expedition JR17003a	PreservedSpecimen	burrowing	small
JR17003_NHM_300	JR17003_NHM_300	Adrian G Glover | Thomas G Dahlgren	Lumbrineridae sp. NHM_300	Regan Drennan	1	unknown	adult	unknown	native	present	specimen stored in 80% non-denatured ethanol aqueous solution	in collection	Animalia	Annelida	Polychaeta		Lumbrineridae			Lumbrineridae	Schmarda, 1861	urn:lsid:marinespecies.org:taxname:967	family	Preliminary identification, molecular identification to follow | sp. NHM_300	52	JR17003a_2_52	2018-03-07	17:33:00	Agassiz Trawl	-63.6161	-57.5035	WGS84	483.01	Antarctica | Southern Ocean	Antarctica	Southern Ocean	Duse Bay	3981	RRS James Clark Ross JR17003a |site Duse Bay 500 m | locationID based on SCAR Composite Gazetteer Of Antarctica	en	NHMUK	British Antarctic Survey expedition JR17003a	PreservedSpecimen	burrowing	small
JR17003_NHM_301	JR17003_NHM_301	Adrian G Glover | Thomas G Dahlgren	Aphelochaeta sp. NHM_301	Regan Drennan	1	unknown	adult	unknown	native	present	specimen stored in 80% non-denatured ethanol aqueous solution	in collection	Animalia	Annelida	Polychaeta		Cirratulidae		Aphelochaeta	Aphelochaeta	Blake, 1991	urn:lsid:marinespecies.org:taxname:129240	genus	Preliminary identification, molecular identification to follow | sp. NHM_301	52	JR17003a_2_52	2018-03-07	17:33:00	Agassiz Trawl	-63.6161	-57.5035	WGS84	483.01	Antarctica | Southern Ocean	Antarctica	Southern Ocean	Duse Bay	3981	RRS James Clark Ross JR17003a |site Duse Bay 500 m | locationID based on SCAR Composite Gazetteer Of Antarctica	en	NHMUK	British Antarctic Survey expedition JR17003a	PreservedSpecimen	burrowing	small
JR17003_NHM_302	JR17003_NHM_302	Adrian G Glover | Thomas G Dahlgren	Maldanidae sp. NHM_302	Regan Drennan	1	unknown	adult	unknown	native	present	specimen stored in 80% non-denatured ethanol aqueous solution	in collection	Animalia	Annelida	Polychaeta		Maldanidae			Maldanidae	Malmgren, 1867	urn:lsid:marinespecies.org:taxname:923	family	Preliminary identification, molecular identification to follow | sp. NHM_302	52	JR17003a_2_52	2018-03-07	17:33:00	Agassiz Trawl	-63.6161	-57.5035	WGS84	483.01	Antarctica | Southern Ocean	Antarctica	Southern Ocean	Duse Bay	3981	RRS James Clark Ross JR17003a |site Duse Bay 500 m | locationID based on SCAR Composite Gazetteer Of Antarctica	en	NHMUK	British Antarctic Survey expedition JR17003a	PreservedSpecimen	burrowing	small
JR17003_NHM_304	JR17003_NHM_304	Adrian G Glover | Thomas G Dahlgren	Leitoscoloplos kerguelensis	Regan Drennan	1	unknown	adult	unknown	native	present	specimen stored in 80% non-denatured ethanol aqueous solution	in collection	Animalia	Annelida	Polychaeta		Orbiniidae		Leitoscoloplos	Leitoscoloplos kerguelensis	(McIntosh, 1885)	urn:lsid:marinespecies.org:taxname:130513	species	Preliminary identification, molecular identification to follow	52	JR17003a_2_52	2018-03-07	17:33:00	Agassiz Trawl	-63.6161	-57.5035	WGS84	483.01	Antarctica | Southern Ocean	Antarctica	Southern Ocean	Duse Bay	3981	RRS James Clark Ross JR17003a |site Duse Bay 500 m | locationID based on SCAR Composite Gazetteer Of Antarctica	en	NHMUK	British Antarctic Survey expedition JR17003a	PreservedSpecimen	burrowing	small
JR17003_NHM_305	JR17003_NHM_305	Adrian G Glover | Thomas G Dahlgren	Augeneria tentaculata	Regan Drennan	1	unknown	adult	unknown	native	present	specimen stored in 80% non-denatured ethanol aqueous solution	in collection	Animalia	Annelida	Polychaeta		Lumbrineridae		Augeneria	Augeneria tentaculata	Monro, 1930	urn:lsid:marinespecies.org:taxname:130225	species	Preliminary identification, molecular identification to follow	52	JR17003a_2_52	2018-03-07	17:33:00	Agassiz Trawl	-63.6161	-57.5035	WGS84	483.01	Antarctica | Southern Ocean	Antarctica	Southern Ocean	Duse Bay	3981	RRS James Clark Ross JR17003a |site Duse Bay 500 m | locationID based on SCAR Composite Gazetteer Of Antarctica	en	NHMUK	British Antarctic Survey expedition JR17003a	PreservedSpecimen	burrowing	medium
JR17003_NHM_306	JR17003_NHM_306	Adrian G Glover | Thomas G Dahlgren	Protodorvillea sp. NHM_290	Regan Drennan	1	unknown	adult	unknown	native	present	specimen stored in 80% non-denatured ethanol aqueous solution	in collection	Animalia	Annelida	Polychaeta		Dorvilleidae		Protodorvillea	Protodorvillea	Pettibone, 1961	urn:lsid:marinespecies.org:taxname:129272	genus	Preliminary identification, molecular identification to follow | sp. NHM_290	52	JR17003a_2_52	2018-03-07	17:33:00	Agassiz Trawl	-63.6161	-57.5035	WGS84	483.01	Antarctica | Southern Ocean	Antarctica	Southern Ocean	Duse Bay	3981	RRS James Clark Ross JR17003a |site Duse Bay 500 m | locationID based on SCAR Composite Gazetteer Of Antarctica	en	NHMUK	British Antarctic Survey expedition JR17003a	PreservedSpecimen	motile surface-dwelling omnivorous	small
JR17003_NHM_309	JR17003_NHM_309	Adrian G Glover | Thomas G Dahlgren	Protodorvillea sp. NHM_290	Regan Drennan	1	unknown	adult	unknown	native	present	specimen stored in 80% non-denatured ethanol aqueous solution	in collection	Animalia	Annelida	Polychaeta		Dorvilleidae		Protodorvillea	Protodorvillea	Pettibone, 1961	urn:lsid:marinespecies.org:taxname:129272	genus	Preliminary identification, molecular identification to follow | sp. NHM_290	52	JR17003a_2_52	2018-03-07	17:33:00	Agassiz Trawl	-63.6161	-57.5035	WGS84	483.01	Antarctica | Southern Ocean	Antarctica	Southern Ocean	Duse Bay	3981	RRS James Clark Ross JR17003a |site Duse Bay 500 m | locationID based on SCAR Composite Gazetteer Of Antarctica	en	NHMUK	British Antarctic Survey expedition JR17003a	PreservedSpecimen	motile surface-dwelling omnivorous	small
JR17003_NHM_310	JR17003_NHM_310	Adrian G Glover | Thomas G Dahlgren	Protodorvillea sp. NHM_290	Regan Drennan	1	unknown	adult	unknown	native	present	specimen stored in 80% non-denatured ethanol aqueous solution	in collection	Animalia	Annelida	Polychaeta		Dorvilleidae		Protodorvillea	Protodorvillea	Pettibone, 1961	urn:lsid:marinespecies.org:taxname:129272	family	Preliminary identification, molecular identification to follow | sp. NHM_290	52	JR17003a_2_52	2018-03-07	17:33:00	Agassiz Trawl	-63.6161	-57.5035	WGS84	483.01	Antarctica | Southern Ocean	Antarctica	Southern Ocean	Duse Bay	3981	RRS James Clark Ross JR17003a |site Duse Bay 500 m | locationID based on SCAR Composite Gazetteer Of Antarctica	en	NHMUK	British Antarctic Survey expedition JR17003a	PreservedSpecimen	motile surface-dwelling omnivorous	small
JR17003_NHM_311	JR17003_NHM_311	Adrian G Glover | Thomas G Dahlgren	Ophelina breviata	Regan Drennan	1	unknown	adult	unknown	native	present	specimen stored in 80% non-denatured ethanol aqueous solution	in collection	Animalia	Annelida	Polychaeta		Opheliidae		Ophelina	Ophelina breviata	(Ehlers, 1913)	urn:lsid:marinespecies.org:taxname:130502	species	Preliminary identification, molecular identification to follow	52	JR17003a_2_52	2018-03-07	17:33:00	Agassiz Trawl	-63.6161	-57.5035	WGS84	483.01	Antarctica | Southern Ocean	Antarctica	Southern Ocean	Duse Bay	3981	RRS James Clark Ross JR17003a |site Duse Bay 500 m | locationID based on SCAR Composite Gazetteer Of Antarctica	en	NHMUK	British Antarctic Survey expedition JR17003a	PreservedSpecimen	burrowing	small
JR17003_NHM_312	JR17003_NHM_312	Adrian G Glover | Thomas G Dahlgren	Leitoscoloplos kerguelensis	Regan Drennan	1	unknown	adult	unknown	native	present	specimen stored in 80% non-denatured ethanol aqueous solution	in collection	Animalia	Annelida	Polychaeta		Orbiniidae		Leitoscoloplos	Leitoscoloplos kerguelensis	(McIntosh, 1885)	urn:lsid:marinespecies.org:taxname:130513	species	Preliminary identification, molecular identification to follow	52	JR17003a_2_52	2018-03-07	17:33:00	Agassiz Trawl	-63.6161	-57.5035	WGS84	483.01	Antarctica | Southern Ocean	Antarctica	Southern Ocean	Duse Bay	3981	RRS James Clark Ross JR17003a |site Duse Bay 500 m | locationID based on SCAR Composite Gazetteer Of Antarctica	en	NHMUK	British Antarctic Survey expedition JR17003a	PreservedSpecimen	burrowing	small
JR17003_NHM_313	JR17003_NHM_313	Adrian G Glover | Thomas G Dahlgren	Maldanidae sp. NHM_302	Regan Drennan	1	unknown	adult	unknown	native	present	specimen stored in 80% non-denatured ethanol aqueous solution	in collection	Animalia	Annelida	Polychaeta		Maldanidae			Maldanidae	Malmgren, 1867	urn:lsid:marinespecies.org:taxname:923	family	Preliminary identification, molecular identification to follow | sp. NHM_302	52	JR17003a_2_52	2018-03-07	17:33:00	Agassiz Trawl	-63.6161	-57.5035	WGS84	483.01	Antarctica | Southern Ocean	Antarctica	Southern Ocean	Duse Bay	3981	RRS James Clark Ross JR17003a |site Duse Bay 500 m | locationID based on SCAR Composite Gazetteer Of Antarctica	en	NHMUK	British Antarctic Survey expedition JR17003a	PreservedSpecimen	burrowing	small
JR17003_NHM_314	JR17003_NHM_314	Adrian G Glover | Thomas G Dahlgren	Leitoscoloplos kerguelensis	Regan Drennan	1	unknown	adult	unknown	native	present	specimen stored in 80% non-denatured ethanol aqueous solution	in collection	Animalia	Annelida	Polychaeta		Orbiniidae		Leitoscoloplos	Leitoscoloplos kerguelensis	(McIntosh, 1885)	urn:lsid:marinespecies.org:taxname:130513	species	Preliminary identification, molecular identification to follow	52	JR17003a_2_52	2018-03-07	17:33:00	Agassiz Trawl	-63.6161	-57.5035	WGS84	483.01	Antarctica | Southern Ocean	Antarctica	Southern Ocean	Duse Bay	3981	RRS James Clark Ross JR17003a |site Duse Bay 500 m | locationID based on SCAR Composite Gazetteer Of Antarctica	en	NHMUK	British Antarctic Survey expedition JR17003a	PreservedSpecimen	burrowing	small
JR17003_NHM_315	JR17003_NHM_315	Adrian G Glover | Thomas G Dahlgren	Aphelochaeta sp. NHM_301	Regan Drennan	1	unknown	adult	unknown	native	present	specimen stored in 80% non-denatured ethanol aqueous solution	in collection	Animalia	Annelida	Polychaeta		Cirratulidae		Aphelochaeta	Aphelochaeta	Blake, 1991	urn:lsid:marinespecies.org:taxname:129240	genus	Preliminary identification, molecular identification to follow | sp. NHM_301	52	JR17003a_2_52	2018-03-07	17:33:00	Agassiz Trawl	-63.6161	-57.5035	WGS84	483.01	Antarctica | Southern Ocean	Antarctica	Southern Ocean	Duse Bay	3981	RRS James Clark Ross JR17003a |site Duse Bay 500 m | locationID based on SCAR Composite Gazetteer Of Antarctica	en	NHMUK	British Antarctic Survey expedition JR17003a	PreservedSpecimen	burrowing	small
JR17003_NHM_316	JR17003_NHM_316	Adrian G Glover | Thomas G Dahlgren	Ophelina cf. cylindricaudata NHM_284	Regan Drennan	1	unknown	adult	unknown	native	present	specimen stored in 80% non-denatured ethanol aqueous solution	in collection	Animalia	Annelida	Polychaeta		Opheliidae		Ophelina	Ophelina	Örsted, 1843	urn:lsid:marinespecies.org:taxname:129414	genus	Preliminary identification, molecular identification to follow | Ophelina cf. cylindricaudata sp. NHM_284	52	JR17003a_2_52	2018-03-07	17:33:00	Agassiz Trawl	-63.6161	-57.5035	WGS84	483.01	Antarctica | Southern Ocean	Antarctica	Southern Ocean	Duse Bay	3981	RRS James Clark Ross JR17003a |site Duse Bay 500 m | locationID based on SCAR Composite Gazetteer Of Antarctica	en	NHMUK	British Antarctic Survey expedition JR17003a	PreservedSpecimen	burrowing	small
JR17003_NHM_317	JR17003_NHM_317	Adrian G Glover | Thomas G Dahlgren	Cirratulidae sp. NHM_317	Regan Drennan	1	unknown	adult	unknown	native	present	specimen stored in 80% non-denatured ethanol aqueous solution	in collection	Animalia	Annelida	Polychaeta		Cirratulidae			Cirratulidae	Ryckholt, 1851	urn:lsid:marinespecies.org:taxname:919	family	Preliminary identification, molecular identification to follow | sp. NHM_317	52	JR17003a_2_52	2018-03-07	17:33:00	Agassiz Trawl	-63.6161	-57.5035	WGS84	483.01	Antarctica | Southern Ocean	Antarctica	Southern Ocean	Duse Bay	3981	RRS James Clark Ross JR17003a |site Duse Bay 500 m | locationID based on SCAR Composite Gazetteer Of Antarctica	en	NHMUK	British Antarctic Survey expedition JR17003a	PreservedSpecimen	burrowing	small
JR17003_NHM_318	JR17003_NHM_318	Adrian G Glover | Thomas G Dahlgren	Leitoscoloplos kerguelensis	Regan Drennan	1	unknown	adult	unknown	native	present	specimen stored in 80% non-denatured ethanol aqueous solution	in collection	Animalia	Annelida	Polychaeta		Orbiniidae		Leitoscoloplos	Leitoscoloplos kerguelensis	(McIntosh, 1885)	urn:lsid:marinespecies.org:taxname:130513	species	Preliminary identification, molecular identification to follow	52	JR17003a_2_52	2018-03-07	17:33:00	Agassiz Trawl	-63.6161	-57.5035	WGS84	483.01	Antarctica | Southern Ocean	Antarctica	Southern Ocean	Duse Bay	3981	RRS James Clark Ross JR17003a |site Duse Bay 500 m | locationID based on SCAR Composite Gazetteer Of Antarctica	en	NHMUK	British Antarctic Survey expedition JR17003a	PreservedSpecimen	burrowing	small
JR17003_NHM_324	JR17003_NHM_324	Adrian G Glover | Thomas G Dahlgren	Ampharetidae sp. NHM_280A	Regan Drennan	2	unknown	adult	unknown	native	present	specimen stored in 80% non-denatured ethanol aqueous solution	in collection	Animalia	Annelida	Polychaeta		Ampharetidae			Ampharetidae	Malmgren, 1866	urn:lsid:marinespecies.org:taxname:981	family	Preliminary identification, molecular identification to follow	56	JR17003a_3_56	2018-03-07	21:52:00	Agassiz Trawl	-63.6253	-57.4863	WGS84	203.85	Antarctica | Southern Ocean	Antarctica	Southern Ocean	Duse Bay	3981	RRS James Clark Ross JR17003a |site Duse Bay 200 m | locationID based on SCAR Composite Gazetteer Of Antarctica	en	NHMUK	British Antarctic Survey expedition JR17003a	PreservedSpecimen	tube-building surface deposit feeding	medium
JR17003_NHM_325	JR17003_NHM_325	Adrian G Glover | Thomas G Dahlgren	Chaetocirratulus andersenensis	Regan Drennan	2	unknown	adult	unknown	native	present	specimen stored in 80% non-denatured ethanol aqueous solution	in collection	Animalia	Annelida	Polychaeta		Cirratulidae		Chaetocirratulus	Chaetocirratulus andersenensis	(Augener, 1932)	urn:lsid:marinespecies.org:taxname:1316611	species	Preliminary identification, molecular identification to follow	56	JR17003a_3_56	2018-03-07	21:52:00	Agassiz Trawl	-63.6253	-57.4863	WGS84	203.85	Antarctica | Southern Ocean	Antarctica	Southern Ocean	Duse Bay	3981	RRS James Clark Ross JR17003a |site Duse Bay 200 m | locationID based on SCAR Composite Gazetteer Of Antarctica	en	NHMUK	British Antarctic Survey expedition JR17003a	PreservedSpecimen	burrowing	small
JR17003_NHM_326	JR17003_NHM_326	Adrian G Glover | Thomas G Dahlgren	Augeneria tentaculata	Regan Drennan	1	unknown	adult	unknown	native	present	specimen stored in 80% non-denatured ethanol aqueous solution	in collection	Animalia	Annelida	Polychaeta		Lumbrineridae		Augeneria	Augeneria tentaculata	Monro, 1930	urn:lsid:marinespecies.org:taxname:130225	species	Preliminary identification, molecular identification to follow	56	JR17003a_3_56	2018-03-07	21:52:00	Agassiz Trawl	-63.6253	-57.4863	WGS84	203.85	Antarctica | Southern Ocean	Antarctica	Southern Ocean	Duse Bay	3981	RRS James Clark Ross JR17003a |site Duse Bay 200 m | locationID based on SCAR Composite Gazetteer Of Antarctica	en	NHMUK	British Antarctic Survey expedition JR17003a	PreservedSpecimen	burrowing	medium
JR17003_NHM_327	JR17003_NHM_327	Adrian G Glover | Thomas G Dahlgren	Maldane sarsi	Regan Drennan	8	unknown	adult	unknown	native	present	specimen stored in 80% non-denatured ethanol aqueous solution	in collection	Animalia	Annelida	Polychaeta		Maldanidae		Maldane	Maldane sarsi	Malmgren, 1865	urn:lsid:marinespecies.org:taxname:130305	species	Preliminary identification, molecular identification to follow	56	JR17003a_3_56	2018-03-07	21:52:00	Agassiz Trawl	-63.6253	-57.4863	WGS84	203.85	Antarctica | Southern Ocean	Antarctica	Southern Ocean	Duse Bay	3981	RRS James Clark Ross JR17003a |site Duse Bay 200 m | locationID based on SCAR Composite Gazetteer Of Antarctica	en	NHMUK	British Antarctic Survey expedition JR17003a	PreservedSpecimen	burrowing	medium
JR17003_NHM_328	JR17003_NHM_328	Adrian G Glover | Thomas G Dahlgren	Paranaitis bowersi	Regan Drennan	1	unknown	adult	unknown	native	present	specimen stored in 80% non-denatured ethanol aqueous solution	in collection	Animalia	Annelida	Polychaeta		Phyllodocidae		Paranaitis	Paranaitis bowersi	(Benham, 1927)	urn:lsid:marinespecies.org:taxname:174233	species	Preliminary identification, molecular identification to follow	56	JR17003a_3_56	2018-03-07	21:52:00	Agassiz Trawl	-63.6253	-57.4863	WGS84	203.85	Antarctica | Southern Ocean	Antarctica	Southern Ocean	Duse Bay	3981	RRS James Clark Ross JR17003a |site Duse Bay 200 m | locationID based on SCAR Composite Gazetteer Of Antarctica	en	NHMUK	British Antarctic Survey expedition JR17003a	PreservedSpecimen	motile surface-dwelling omnivorous	medium
JR17003_NHM_329	JR17003_NHM_329	Adrian G Glover | Thomas G Dahlgren	Polynoidae sp. NHM_140D	Regan Drennan	1	unknown	adult	unknown	native	present	specimen stored in 80% non-denatured ethanol aqueous solution	in collection	Animalia	Annelida	Polychaeta		Polynoidae			Polynoidae	Kinberg, 1856	urn:lsid:marinespecies.org:taxname:939	family	Preliminary identification, molecular identification to follow | sp. NHM_140D	56	JR17003a_3_56	2018-03-07	21:52:00	Agassiz Trawl	-63.6253	-57.4863	WGS84	203.85	Antarctica | Southern Ocean	Antarctica	Southern Ocean	Duse Bay	3981	RRS James Clark Ross JR17003a |site Duse Bay 200 m | locationID based on SCAR Composite Gazetteer Of Antarctica	en	NHMUK	British Antarctic Survey expedition JR17003a	PreservedSpecimen	motile surface-dwelling omnivorous	medium
JR17003_NHM_330	JR17003_NHM_330	Adrian G Glover | Thomas G Dahlgren	Harmothoe cf. fullo NHM_330	Regan Drennan	1	unknown	adult	unknown	native	present	specimen stored in 80% non-denatured ethanol aqueous solution	in collection	Animalia	Annelida	Polychaeta		Polynoidae		Harmothoe	Harmothoe	Kinberg, 1856	urn:lsid:marinespecies.org:taxname:129491	genus	Preliminary identification, molecular identification to follow |Harmothoe cf. fullo sp. NHM_330	56	JR17003a_3_56	2018-03-07	21:52:00	Agassiz Trawl	-63.6253	-57.4863	WGS84	203.85	Antarctica | Southern Ocean	Antarctica	Southern Ocean	Duse Bay	3981	RRS James Clark Ross JR17003a |site Duse Bay 200 m | locationID based on SCAR Composite Gazetteer Of Antarctica	en	NHMUK	British Antarctic Survey expedition JR17003a	PreservedSpecimen	motile surface-dwelling omnivorous	medium
JR17003_NHM_331	JR17003_NHM_331	Adrian G Glover | Thomas G Dahlgren	Sabellidae sp. NHM_272	Regan Drennan	19	unknown	adult	unknown	native	present	specimen stored in 80% non-denatured ethanol aqueous solution	in collection	Animalia	Annelida	Polychaeta		Sabellidae			Sabellidae	Latreille, 1825	urn:lsid:marinespecies.org:taxname:985	family	Preliminary identification, molecular identification to follow | sp. NHM_272	56	JR17003a_3_56	2018-03-07	21:52:00	Agassiz Trawl	-63.6253	-57.4863	WGS84	203.85	Antarctica | Southern Ocean	Antarctica	Southern Ocean	Duse Bay	3981	RRS James Clark Ross JR17003a |site Duse Bay 200 m | locationID based on SCAR Composite Gazetteer Of Antarctica	en	NHMUK	British Antarctic Survey expedition JR17003a	PreservedSpecimen	tube building suspension feeding	medium
JR17003_NHM_332	JR17003_NHM_332	Adrian G Glover | Thomas G Dahlgren	Sabellidae sp. NHM_332	Regan Drennan	6	unknown	adult	unknown	native	present	specimen stored in 80% non-denatured ethanol aqueous solution	in collection	Animalia	Annelida	Polychaeta		Sabellidae			Sabellidae	Latreille, 1825	urn:lsid:marinespecies.org:taxname:985	family	Preliminary identification, molecular identification to follow | sp. NHM_332	56	JR17003a_3_56	2018-03-07	21:52:00	Agassiz Trawl	-63.6253	-57.4863	WGS84	203.85	Antarctica | Southern Ocean	Antarctica	Southern Ocean	Duse Bay	3981	RRS James Clark Ross JR17003a |site Duse Bay 200 m | locationID based on SCAR Composite Gazetteer Of Antarctica	en	NHMUK	British Antarctic Survey expedition JR17003a	PreservedSpecimen	tube building suspension feeding	medium
JR17003_NHM_333	JR17003_NHM_333	Adrian G Glover | Thomas G Dahlgren	Sternaspis sendalli	Regan Drennan	2	unknown	adult	unknown	native	present	specimen stored in 80% non-denatured ethanol aqueous solution	in collection	Animalia	Annelida	Polychaeta		Sternaspidae		Sternaspis	Sternaspis sendalli	Salazar-Vallejo, 2014	urn:lsid:marinespecies.org:taxname:817290	species	Preliminary identification, molecular identification to follow	56	JR17003a_3_56	2018-03-07	21:52:00	Agassiz Trawl	-63.6253	-57.4863	WGS84	203.85	Antarctica | Southern Ocean	Antarctica	Southern Ocean	Duse Bay	3981	RRS James Clark Ross JR17003a |site Duse Bay 200 m | locationID based on SCAR Composite Gazetteer Of Antarctica	en	NHMUK	British Antarctic Survey expedition JR17003a	PreservedSpecimen	burrowing	small
JR17003_NHM_334	JR17003_NHM_334	Adrian G Glover | Thomas G Dahlgren	Pista mirabilis	Regan Drennan	1	unknown	adult	unknown	native	present	specimen stored in 80% non-denatured ethanol aqueous solution	in collection	Animalia	Annelida	Polychaeta		Terebellidae		Pista	Pista mirabilis	McIntosh, 1885	urn:lsid:marinespecies.org:taxname:131520	species	Preliminary identification, molecular identification to follow	56	JR17003a_3_56	2018-03-07	21:52:00	Agassiz Trawl	-63.6253	-57.4863	WGS84	203.85	Antarctica | Southern Ocean	Antarctica	Southern Ocean	Duse Bay	3981	RRS James Clark Ross JR17003a |site Duse Bay 200 m | locationID based on SCAR Composite Gazetteer Of Antarctica	en	NHMUK	British Antarctic Survey expedition JR17003a	PreservedSpecimen	tube-building surface deposit feeding	medium
JR17003_NHM_335	JR17003_NHM_335	Adrian G Glover | Thomas G Dahlgren	Pista mirabilis	Regan Drennan	1	unknown	adult	unknown	native	present	specimen stored in 80% non-denatured ethanol aqueous solution	in collection	Animalia	Annelida	Polychaeta		Terebellidae		Pista	Pista mirabilis	McIntosh, 1885	urn:lsid:marinespecies.org:taxname:131520	species	Preliminary identification, molecular identification to follow	56	JR17003a_3_56	2018-03-07	21:52:00	Agassiz Trawl	-63.6253	-57.4863	WGS84	203.85	Antarctica | Southern Ocean	Antarctica	Southern Ocean	Duse Bay	3981	RRS James Clark Ross JR17003a |site Duse Bay 200 m | locationID based on SCAR Composite Gazetteer Of Antarctica	en	NHMUK	British Antarctic Survey expedition JR17003a	PreservedSpecimen	tube-building surface deposit feeding	large
JR17003_NHM_336	JR17003_NHM_336	Adrian G Glover | Thomas G Dahlgren	Pista mirabilis	Regan Drennan	1	unknown	adult	unknown	native	present	specimen stored in 80% non-denatured ethanol aqueous solution	in collection	Animalia	Annelida	Polychaeta		Terebellidae		Pista	Pista mirabilis	McIntosh, 1885	urn:lsid:marinespecies.org:taxname:131520	species	Preliminary identification, molecular identification to follow	56	JR17003a_3_56	2018-03-07	21:52:00	Agassiz Trawl	-63.6253	-57.4863	WGS84	203.85	Antarctica | Southern Ocean	Antarctica	Southern Ocean	Duse Bay	3981	RRS James Clark Ross JR17003a |site Duse Bay 200 m | locationID based on SCAR Composite Gazetteer Of Antarctica	en	NHMUK	British Antarctic Survey expedition JR17003a	PreservedSpecimen	tube-building surface deposit feeding	large
JR17003_NHM_337	JR17003_NHM_337	Adrian G Glover | Thomas G Dahlgren	Terebellidae sp. NHM_337	Regan Drennan	1	unknown	adult	unknown	native	present	specimen stored in 80% non-denatured ethanol aqueous solution	in collection	Animalia	Annelida	Polychaeta		Terebellidae			Terebellidae	Johnston, 1846	urn:lsid:marinespecies.org:taxname:982	family	Preliminary identification, molecular identification to follow | sp. NHM_337	56	JR17003a_3_56	2018-03-07	21:52:00	Agassiz Trawl	-63.6253	-57.4863	WGS84	203.85	Antarctica | Southern Ocean	Antarctica	Southern Ocean	Duse Bay	3981	RRS James Clark Ross JR17003a |site Duse Bay 200 m | locationID based on SCAR Composite Gazetteer Of Antarctica	en	NHMUK	British Antarctic Survey expedition JR17003a	PreservedSpecimen	tube-building surface deposit feeding	medium
JR17003_NHM_338	JR17003_NHM_338	Adrian G Glover | Thomas G Dahlgren	Trichobranchidae sp. NHM_280M	Regan Drennan	1	unknown	adult	unknown	native	present	specimen stored in 80% non-denatured ethanol aqueous solution	in collection	Animalia	Annelida	Polychaeta		Trichobranchidae			Trichobranchidae	Malmgren, 1866	urn:lsid:marinespecies.org:taxname:983	family	Preliminary identification, molecular identification to follow | sp. NHM_280M	56	JR17003a_3_56	2018-03-07	21:52:00	Agassiz Trawl	-63.6253	-57.4863	WGS84	203.85	Antarctica | Southern Ocean	Antarctica	Southern Ocean	Duse Bay	3981	RRS James Clark Ross JR17003a |site Duse Bay 200 m | locationID based on SCAR Composite Gazetteer Of Antarctica	en	NHMUK	British Antarctic Survey expedition JR17003a	PreservedSpecimen	tube-building surface deposit feeding	medium
